# Supplementary material for: A computational approach to map nucleosome positions and alternative chromatin states with base pair resolution
Source: eLife. 2016 Sep 13;5:e16970. doi: 10.7554/eLife.16970 (PMC5094857; doi:10.7554/eLife.16970)
Supplement: Figure 6—source data 1. — DOI: http://dx.doi.org/10.7554/eLife.16970.024 [file elife-16970-fig6-data1.xlsx]

## Sheet: Sheet1
GENE NAME	Chr	TSS cordinate	Direction	Number of TBB positions	Average Center of TBB	Proxmial TBB	Distal TBB
YAL068C	1	2271	C	1	2249	2249	2249
YAL067C	1	9119	C	1	9155	9155	9155
YAL061W	1	33365	W	1	33364	33364	33364
YAL060W	1	35085	W	1	35078	35078	35078
YAL051W	1	48525	W	1	48551	48551	48551
YAL037W	1	73891	W	1	73885	73885	73885
YAL036C	1	76199	C	1	76154	76154	76154
YAL030W	1	87251	W	1	87313	87313	87313
YAL021C	1	113423	C	1	113358	113358	113358
YAL018C	1	119644	C	1	119598	119598	119598
YAL017W	1	119851	W	1	119913	119913	119913
YAL016W	1	124787	W	1	124849	124849	124849
YAL012W	1	130731	W	1	130763	130763	130763
YAL005C	1	141535	C	1	141549	141549	141549
YAL001C	1	151007	C	1	150972	150972	150972
YAR003W	1	154923	W	1	154991	154991	154991
YAR015W	1	169259	W	1	169260	169260	169260
YAR068W	1	222295	W	1	222304	222304	222304
YBL111C	2	5111	C	1	5122	5122	5122
YBL100W-C	2	28325	W	1	28390	28390	28390
YBL099W	2	36733	W	1	36769	36769	36769
YBL092W	2	45629	W	1	45648	45648	45648
YBL090W	2	48789	W	1	48840	48840	48840
YBL086C	2	62697	C	1	62657	62657	62657
YBL085W	2	63646	W	1	63710	63710	63710
YBL079W	2	75189	W	1	75236	75236	75236
YBL076C	2	84289	C	1	84246	84246	84246
YBL068W	2	92349	W	1	92411	92411	92411
YBL067C	2	96170	C	1	96105	96105	96105
YBL056W	2	113635	W	1	113695	113695	113695
YBL054W	2	117483	W	1	117452	117452	117452
YBL051C	2	124847	C	1	124783	124783	124783
YBL043W	2	136323	W	1	136389	136389	136389
YBL044W	2	136323	W	1	136389	136389	136389
YBL042C	2	140327	C	1	140316	140316	140316
YBL041W	2	141195	W	1	141262	141262	141262
YBL039C	2	145815	C	1	145765	145765	145765
YBL032W	2	160091	W	1	160149	160149	160149
YBL031W	2	161667	W	1	161726	161726	161726
YBL029C-A	2	164877	C	1	164869	164869	164869
YBL028C	2	167895	C	1	167827	167827	167827
YBL023C	2	177567	C	1	177558	177558	177558
YBL019W	2	184379	W	1	184362	184362	184362
YBL018C	2	186535	C	1	186468	186468	186468
YBL013W	2	201957	W	1	202030	202030	202030
YBL006C	2	217160	C	1	217107	217107	217107
YBL004W	2	227516	W	1	227575	227575	227575
YBR001C	2	241352	C	1	241387	241387	241387
YBR003W	2	242780	W	1	242830	242830	242830
YBR004C	2	245704	C	1	245640	245640	245640
YBR005W	2	245820	W	1	245893	245893	245893
YBR006W	2	246884	W	1	246900	246900	246900
YBR007C	2	251112	C	1	251095	251095	251095
YBR011C	2	258032	C	1	257975	257975	257975
YBR020W	2	278844	W	1	278789	278789	278789
YBR023C	2	288064	C	1	288030	288030	288030
YBR034C	2	306015	C	1	305971	305971	305971
YBR037C	2	311496	C	1	311434	311434	311434
YBR043C	2	324096	C	1	324050	324050	324050
YBR045C	2	330192	C	1	330189	330189	330189
YBR046C	2	331552	C	1	331521	331521	331521
YBR080C	2	400919	C	1	400877	400877	400877
YBR086C	2	423343	C	1	423286	423286	423286
YBR089C-A	2	426585	C	1	426637	426637	426637
YBR097W	2	436763	W	1	436706	436706	436706
YBR109C	2	458408	C	1	458377	458377	458377
YBR122C	2	484544	C	1	484489	484489	484489
YBR129C	2	495376	C	1	495325	495325	495325
YBR130C	2	496928	C	1	496882	496882	496882
YBR136W	2	505436	W	1	505432	505432	505432
YBR140C	2	526724	C	1	526700	526700	526700
YBR143C	2	532248	C	1	532195	532195	532195
YBR146W	2	535172	W	1	535233	535233	535233
YBR152W	2	546308	W	1	546373	546373	546373
YBR173C	2	582216	C	1	582153	582153	582153
YBR196C-B	2	614727	C	1	614723	614723	614723
YBR197C	2	615880	C	1	615826	615826	615826
YBR203W	2	629061	W	1	628992	628992	628992
YBR204C	2	633424	C	1	633377	633377	633377
YBR208C	2	642328	C	1	642266	642266	642266
YBR211C	2	647232	C	1	647189	647189	647189
YBR212W	2	647436	W	1	647494	647494	647494
YBR215W	2	653452	W	1	653518	653518	653518
YBR219C	2	663400	C	1	663380	663380	663380
YBR237W	2	691908	W	1	691971	691971	691971
YBR238C	2	697392	C	1	697366	697366	697366
YBR240C	2	701939	C	1	701937	701937	701937
YBR245C	2	711408	C	1	711347	711347	711347
YBR257W	2	728828	W	1	728890	728890	728890
YBR262C	2	736080	C	1	736022	736022	736022
YBR263W	2	736196	W	1	736262	736262	736262
YBR268W	2	741260	W	1	741331	741331	741331
YBR274W	2	749532	W	1	749593	749593	749593
YBR280C	2	765104	C	1	765121	765121	765121
YBR282W	2	768196	W	1	768258	768258	768258
YBR283C	2	770568	C	1	770558	770558	770558
YBR288C	2	779504	C	1	779447	779447	779447
YBR297W	2	800468	W	1	800485	800485	800485
YCL073C	3	8428	C	1	8478	8478	8478
YCL064C	3	16937	C	1	16943	16943	16943
YCL054W	3	31429	W	1	31459	31459	31459
YCL051W	3	35557	W	1	35622	35622	35622
YCL050C	3	38873	C	1	38821	38821	38821
YCL040W	3	50781	W	1	50745	50745	50745
YCL027W	3	71757	W	1	71734	71734	71734
YCL018W	3	91181	W	1	91218	91218	91218
YCL009C	3	105585	C	1	105523	105523	105523
YCL001W-B	3	113666	W	1	113684	113684	113684
YCR002C	3	118409	C	1	118344	118344	118344
YCR010C	3	133224	C	1	133236	133236	133236
YCR021C	3	157217	C	1	157271	157271	157271
YCR023C	3	160449	C	1	160389	160389	160389
YCR028C	3	172537	C	1	172471	172471	172471
YCR032W	3	179414	W	1	179428	179428	179428
YCR033W	3	186261	W	1	186316	186316	186316
YCR034W	3	190533	W	1	190600	190600	190600
YCR038C	3	199537	C	1	199506	199506	199506
YCR043C	3	206697	C	1	206626	206626	206626
YCR047C	3	211649	C	1	211576	211576	211576
YCR065W	3	229173	W	1	229128	229128	229128
YCR095W-A	3	289534	W	1	289542	289542	289542
YCR096C	3	293637	C	1	293687	293687	293687
YCR097W	3	293730	W	1	293687	293687	293687
YCR100C	3	302320	C	1	302297	302297	302297
YCR104W	3	307696	W	1	307726	307726	307726
YDL246C	4	9858	C	1	9908	9908	9908
YDL245C	4	13462	C	1	13442	13442	13442
YDL241W	4	20173	W	1	20195	20195	20195
YDL231C	4	42369	C	1	42315	42315	42315
YDL230W	4	42653	W	1	42710	42710	42710
YDL227C	4	48081	C	1	48068	48068	48068
YDL224C	4	56729	C	1	56664	56664	56664
YDL220C	4	65041	C	1	64990	64990	64990
YDL217C	4	68777	C	1	68729	68729	68729
YDL216C	4	70577	C	1	70544	70544	70544
YDL211C	4	80489	C	1	80447	80447	80447
YDL208W	4	87469	W	1	87533	87533	87533
YDL195W	4	107085	W	1	107125	107125	107125
YDL183C	4	131921	C	1	131903	131903	131903
YDL171C	4	155921	C	1	155919	155919	155919
YDL167C	4	163217	C	1	163161	163161	163161
YDL166C	4	164105	C	1	164047	164047	164047
YDL157C	4	174641	C	1	174572	174572	174572
YDL146W	4	192649	W	1	192605	192605	192605
YDL143W	4	199949	W	1	200003	200003	200003
YDL135C	4	219377	C	1	219316	219316	219316
YDL134C	4	220873	C	1	220914	220914	220914
YDL125C	4	239809	C	1	239873	239873	239873
YDL124W	4	240205	W	1	240222	240222	240222
YDL122W	4	242349	W	1	242367	242367	242367
YDL104C	4	274921	C	1	274859	274859	274859
YDL083C	4	307825	C	1	307768	307768	307768
YDL082W	4	308357	W	1	308424	308424	308424
YDL081C	4	310209	C	1	310153	310153	310153
YDL079C	4	314850	C	1	314781	314781	314781
YDL074C	4	326233	C	1	326162	326162	326162
YDL069C	4	334089	C	1	334094	334094	334094
YDL063C	4	340233	C	1	340201	340201	340201
YDL061C	4	341281	C	1	341215	341215	341215
YDL055C	4	356921	C	1	356852	356852	356852
YDL053C	4	362457	C	1	362396	362396	362396
YDL048C	4	368257	C	1	368283	368283	368283
YDL037C	4	385769	C	1	385702	385702	385702
YDL036C	4	388905	C	1	388839	388839	388839
YDL033C	4	393937	C	1	393900	393900	393900
YDL029W	4	399477	W	1	399536	399536	399536
YDL028C	4	403433	C	1	403407	403407	403407
YDL022W	4	411749	W	1	411694	411694	411694
YDL020C	4	416937	C	1	416918	416918	416918
YDL015C	4	426985	C	1	426942	426942	426942
YDL014W	4	427205	W	1	427264	427264	427264
YDL003W	4	444557	W	1	444512	444512	444512
YDL002C	4	447697	C	1	447670	447670	447670
YDL001W	4	447901	W	1	447950	447950	447950
YDR004W	4	455213	W	1	455259	455259	455259
YDR007W	4	461645	W	1	461658	461658	461658
YDR017C	4	482385	C	1	482325	482325	482325
YDR025W	4	491469	W	1	491535	491535	491535
YDR039C	4	534681	C	1	534667	534667	534667
YDR042C	4	541626	C	1	541598	541598	541598
YDR047W	4	551566	W	1	551511	551511	551511
YDR052C	4	560778	C	1	560721	560721	560721
YDR061W	4	574126	W	1	574153	574153	574153
YDR062W	4	576070	W	1	576129	576129	576129
YDR063W	4	578526	W	1	578593	578593	578593
YDR070C	4	588554	C	1	588521	588521	588521
YDR072C	4	591530	C	1	591466	591466	591466
YDR074W	4	593686	W	1	593688	593688	593688
YDR075W	4	596966	W	1	597023	597023	597023
YDR080W	4	603966	W	1	604022	604022	604022
YDR083W	4	612046	W	1	612073	612073	612073
YDR087C	4	618346	C	1	618300	618300	618300
YDR089W	4	622014	W	1	621995	621995	621995
YDR100W	4	654966	W	1	655020	655020	655020
YDR103W	4	658294	W	1	658361	658361	658361
YDR110W	4	676030	W	1	676103	676103	676103
YDR114C	4	682325	C	1	682358	682358	682358
YDR124W	4	700210	W	1	700212	700212	700212
YDR129C	4	715434	C	1	715375	715375	715375
YDR130C	4	716650	C	1	716605	716605	716605
YDR138W	4	730542	W	1	730602	730602	730602
YDR156W	4	769470	W	1	769531	769531	769531
YDR158W	4	770326	W	1	770333	770333	770333
YDR160W	4	775982	W	1	776030	776030	776030
YDR164C	4	784258	C	1	784208	784208	784208
YDR166C	4	789282	C	1	789235	789235	789235
YDR169C	4	794258	C	1	794215	794215	794215
YDR172W	4	808246	W	1	808305	808305	808305
YDR175C	4	814194	C	1	814154	814154	814154
YDR182W-A	4	829046	W	1	829029	829029	829029
YDR183W	4	829535	W	1	829602	829602	829602
YDR198C	4	853995	C	1	853954	853954	853954
YDR225W	4	915423	W	1	915435	915435	915435
YDR242W	4	946711	W	1	946726	946726	946726
YDR247W	4	955647	W	1	955669	955669	955669
YDR253C	4	964803	C	1	964774	964774	964774
YDR256C	4	969811	C	1	969791	969791	969791
YDR258C	4	974283	C	1	974299	974299	974299
YDR260C	4	977283	C	1	977232	977232	977232
YDR266C	4	1002235	C	1	1002181	1002181	1002181
YDR270W	4	1005575	W	1	1005584	1005584	1005584
YDR277C	4	1015843	C	1	1015858	1015858	1015858
YDR283C	4	1030275	C	1	1030244	1030244	1030244
YDR291W	4	1039695	W	1	1039755	1039755	1039755
YDR296W	4	1055135	W	1	1055203	1055203	1055203
YDR299W	4	1059559	W	1	1059620	1059620	1059620
YDR304C	4	1072603	C	1	1072545	1072545	1072545
YDR305C	4	1073666	C	1	1073653	1073653	1073653
YDR308C	4	1078483	C	1	1078441	1078441	1078441
YDR310C	4	1084595	C	1	1084547	1084547	1084547
YDR312W	4	1087527	W	1	1087565	1087565	1087565
YDR314C	4	1092779	C	1	1092762	1092762	1092762
YDR326C	4	1125083	C	1	1125060	1125060	1125060
YDR331W	4	1129551	W	1	1129608	1129608	1129608
YDR332W	4	1130791	W	1	1130766	1130766	1130766
YDR343C	4	1161416	C	1	1161428	1161428	1161428
YDR357C	4	1189723	C	1	1189667	1189667	1189667
YDR364C	4	1204227	C	1	1204154	1204154	1204154
YDR368W	4	1213831	W	1	1213870	1213870	1213870
YDR373W	4	1222663	W	1	1222712	1222712	1222712
YDR377W	4	1228511	W	1	1228542	1228542	1228542
YDR382W	4	1239391	W	1	1239433	1239433	1239433
YDR383C	4	1241043	C	1	1241075	1241075	1241075
YDR384C	4	1242139	C	1	1242137	1242137	1242137
YDR386W	4	1245903	W	1	1245848	1245848	1245848
YDR389W	4	1252427	W	1	1252378	1252378	1252378
YDR390C	4	1256883	C	1	1256814	1256814	1256814
YDR399W	4	1269975	W	1	1269975	1269975	1269975
YDR403W	4	1274492	W	1	1274520	1274520	1274520
YDR408C	4	1288923	C	1	1288897	1288897	1288897
YDR410C	4	1293147	C	1	1293117	1293117	1293117
YDR411C	4	1294435	C	1	1294379	1294379	1294379
YDR414C	4	1296780	C	1	1296818	1296818	1296818
YDR416W	4	1298311	W	1	1298372	1298372	1298372
YDR421W	4	1311927	W	1	1311993	1311993	1311993
YDR427W	4	1322151	W	1	1322213	1322213	1322213
YDR434W	4	1331103	W	1	1331160	1331160	1331160
YDR436W	4	1334559	W	1	1334548	1334548	1334548
YDR444W	4	1350191	W	1	1350260	1350260	1350260
YDR447C	4	1355571	C	1	1355526	1355526	1355526
YDR452W	4	1362719	W	1	1362749	1362749	1362749
YDR456W	4	1367415	W	1	1367483	1367483	1367483
YDR457W	4	1369631	W	1	1369700	1369700	1369700
YDR458C	4	1382283	C	1	1382294	1382294	1382294
YDR461W	4	1385063	W	1	1385077	1385077	1385077
YDR462W	4	1386007	W	1	1386062	1386062	1386062
YDR463W	4	1386751	W	1	1386821	1386821	1386821
YDR464W	4	1388735	W	1	1388797	1388797	1388797
YDR495C	4	1441139	C	1	1441155	1441155	1441155
YDR500C	4	1450883	C	1	1450844	1450844	1450844
YDR501W	4	1451215	W	1	1451244	1451244	1451244
YDR502C	4	1454507	C	1	1454571	1454571	1454571
YDR510W	4	1469319	W	1	1469338	1469338	1469338
YDR520C	4	1483483	C	1	1483463	1483463	1483463
YDR523C	4	1487132	C	1	1487161	1487161	1487161
YDR533C	4	1502315	C	1	1502346	1502346	1502346
YDR538W	4	1510823	W	1	1510870	1510870	1510870
YEL071W	5	16293	W	1	16324	16324	16324
YEL070W	5	19487	W	1	19495	19495	19495
YEL069C	5	23281	C	1	23261	23261	23261
YEL060C	5	42009	C	1	41961	41961	41961
YEL059C-A	5	42665	C	1	42622	42622	42622
YEL058W	5	43205	W	1	43276	43276	43276
YEL055C	5	51609	C	1	51581	51581	51581
YEL054C	5	53265	C	1	53205	53205	53205
YEL047C	5	66817	C	1	66798	66798	66798
YEL041W	5	75842	W	1	75840	75840	75840
YEL040W	5	78021	W	1	78014	78014	78014
YEL029C	5	97841	C	1	97836	97836	97836
YEL027W	5	100685	W	1	100751	100751	100751
YEL021W	5	116117	W	1	116154	116154	116154
YEL018W	5	121453	W	1	121503	121503	121503
YER005W	5	160525	W	1	160504	160504	160504
YER006W	5	162669	W	1	162742	162742	162742
YER008C	5	171889	C	1	171827	171827	171827
YER009W	5	172053	W	1	172116	172116	172116
YER014W	5	182549	W	1	182602	182602	182602
YER024W	5	202089	W	1	202159	202159	202159
YER025W	5	205181	W	1	205244	205244	205244
YER026C	5	208561	C	1	208494	208494	208494
YER031C	5	214785	C	1	214733	214733	214733
YER032W	5	214981	W	1	215027	215027	215027
YER033C	5	221353	C	1	221288	221288	221288
YER034W	5	221798	W	1	221859	221859	221859
YER037W	5	225829	W	1	225820	225820	225820
YER043C	5	237177	C	1	237161	237161	237161
YER049W	5	251637	W	1	251670	251670	251670
YER056C	5	268201	C	1	268206	268206	268206
YER056C-A	5	270217	C	1	270163	270163	270163
YER057C	5	271201	C	1	271184	271184	271184
YER059W	5	272445	W	1	272482	272482	272482
YER064C	5	284305	C	1	284306	284306	284306
YER068W	5	292973	W	1	292994	292994	292994
YER073W	5	303949	W	1	303938	303938	303938
YER077C	5	316553	C	1	316494	316494	316494
YER078C	5	318457	C	1	318502	318502	318502
YER078W-A	5	318540	W	1	318502	318502	318502
YER088C	5	335305	C	1	335310	335310	335310
YER090W	5	337869	W	1	337912	337912	337912
YER093C-A	5	348657	C	1	348599	348599	348599
YER095W	5	349909	W	1	349920	349920	349920
YER102W	5	362685	W	1	362737	362737	362737
YER111C	5	386193	C	1	386189	386189	386189
YER112W	5	387133	W	1	387195	387195	387195
YER119C	5	400873	C	1	400823	400823	400823
YER122C	5	404433	C	1	404363	404363	404363
YER126C	5	414249	C	1	414203	414203	414203
YER127W	5	414453	W	1	414511	414511	414511
YER138W-A	5	449368	W	1	449425	449425	449425
YER142C	5	456073	C	1	456058	456058	456058
YER144C	5	460481	C	1	460453	460453	460453
YER145C	5	461777	C	1	461747	461747	461747
YER148W	5	465085	W	1	465143	465143	465143
YER151C	5	472521	C	1	472462	472462	472462
YER153C	5	474745	C	1	474759	474759	474759
YER155C	5	482881	C	1	482838	482838	482838
YER156C	5	484361	C	1	484308	484308	484308
YER161C	5	500393	C	1	500345	500345	500345
YER167W	5	517925	W	1	517864	517864	517864
YER173W	5	536269	W	1	536298	536298	536298
YER175W-A	5	540543	W	1	540549	540549	540549
YER176W	5	541637	W	1	541686	541686	541686
YER180C	5	550624	C	1	550603	550603	550603
YER189W	5	571048	W	1	570998	570998	570998
YFL057C	6	14865	C	1	14824	14824	14824
YFL053W	6	23321	W	1	23299	23299	23299
YFL050C	6	35950	C	1	35918	35918	35918
YFL045C	6	44481	C	1	44470	44470	44470
YFL041W	6	49101	W	1	49169	49169	49169
YFL030W	6	76727	W	1	76734	76734	76734
YFL021W	6	96013	W	1	95951	95951	95951
YFL016C	6	106296	C	1	106233	106233	106233
YFL014W	6	107197	W	1	107175	107175	107175
YFL009W	6	115957	W	1	115989	115989	115989
YFL005W	6	130133	W	1	130189	130189	130189
YFR004W	6	153341	W	1	153395	153395	153395
YFR025C	6	204769	C	1	204782	204782	204782
YFR036W	6	226909	W	1	226974	226974	226974
YFR037C	6	229217	C	1	229145	229145	229145
YFR039C	6	233657	C	1	233600	233600	233600
YFR045W	6	241949	W	1	242004	242004	242004
YFR048W	6	246077	W	1	246137	246137	246137
YFR057W	6	268946	W	1	268938	268938	268938
YGL258W	7	11008	W	1	11021	11021	11021
YGL255W	7	20741	W	1	20794	20794	20794
YGL254W	7	22293	W	1	22333	22333	22333
YGL253W	7	23877	W	1	23916	23916	23916
YGL252C	7	27529	C	1	27490	27490	27490
YGL228W	7	67542	W	1	67584	67584	67584
YGL222C	7	81482	C	1	81475	81475	81475
YGL216W	7	84614	W	1	84658	84658	84658
YGL201C	7	120963	C	1	120918	120918	120918
YGL196W	7	129855	W	1	129830	129830	129830
YGL195W	7	131487	W	1	131546	131546	131546
YGL189C	7	149003	C	1	148955	148955	148955
YGL178W	7	166887	W	1	166951	166951	166951
YGL175C	7	174355	C	1	174325	174325	174325
YGL174W	7	174527	W	1	174577	174577	174577
YGL172W	7	180663	W	1	180719	180719	180719
YGL168W	7	187368	W	1	187349	187349	187349
YGL167C	7	190899	C	1	190834	190834	190834
YGL157W	7	208951	W	1	208973	208973	208973
YGL153W	7	216239	W	1	216273	216273	216273
YGL146C	7	229866	C	1	229816	229816	229816
YGL145W	7	230175	W	1	230230	230230	230230
YGL139W	7	245391	W	1	245443	245443	245443
YGL133W	7	257503	W	1	257498	257498	257498
YGL117W	7	288423	W	1	288460	288460	288460
YGL112C	7	299779	C	1	299728	299728	299728
YGL106W	7	306519	W	1	306583	306583	306583
YGL089C	7	345258	C	1	345205	345205	345205
YGL087C	7	346963	C	1	346934	346934	346934
YGL076C	7	366075	C	1	366038	366038	366038
YGL075C	7	368291	C	1	368248	368248	368248
YGL054C	7	401395	C	1	401327	401327	401327
YGL053W	7	402490	W	1	402497	402497	402497
YGL050W	7	405735	W	1	405784	405784	405784
YGL047W	7	411464	W	1	411535	411535	411535
YGL039W	7	423855	W	1	423825	423825	423825
YGL035C	7	433187	C	1	433157	433157	433157
YGL032C	7	436971	C	1	436952	436952	436952
YGL029W	7	440023	W	1	440061	440061	440061
YGL022W	7	452343	W	1	452388	452388	452388
YGL021W	7	454831	W	1	454814	454814	454814
YGL016W	7	461607	W	1	461656	461656	461656
YGL013C	7	472451	C	1	472403	472403	472403
YGL009C	7	478739	C	1	478700	478700	478700
YGR014W	7	516671	W	1	516685	516685	516685
YGR016W	7	522239	W	1	522280	522280	522280
YGR020C	7	527419	C	1	527346	527346	527346
YGR028W	7	542063	W	1	542060	542060	542060
YGR029W	7	543335	W	1	543346	543346	543346
YGR035C	7	557587	C	1	557568	557568	557568
YGR042W	7	579455	W	1	579513	579513	579513
YGR043C	7	581542	C	1	581528	581528	581528
YGR047C	7	589515	C	1	589449	589449	589449
YGR049W	7	591167	W	1	591208	591208	591208
YGR054W	7	596519	W	1	596568	596568	596568
YGR055W	7	599375	W	1	599378	599378	599378
YGR063C	7	617867	C	1	617799	617799	617799
YGR070W	7	627703	W	1	627769	627769	627769
YGR074W	7	635687	W	1	635739	635739	635739
YGR089W	7	656687	W	1	656725	656725	656725
YGR092W	7	668103	W	1	668106	668106	668106
YGR102C	7	695155	C	1	695118	695118	695118
YGR108W	7	703375	W	1	703412	703412	703412
YGR120C	7	730867	C	1	730796	730796	730796
YGR121C	7	732763	C	1	732763	732763	732763
YGR122W	7	733767	W	1	733743	733743	733743
YGR127W	7	746415	W	1	746375	746375	746375
YGR129W	7	750375	W	1	750390	750390	750390
YGR131W	7	754527	W	1	754593	754593	754593
YGR135W	7	761311	W	1	761372	761372	761372
YGR138C	7	765899	C	1	765891	765891	765891
YGR141W	7	770511	W	1	770562	770562	770562
YGR152C	7	795659	C	1	795610	795610	795610
YGR162W	7	824015	W	1	824015	824015	824015
YGR167W	7	832368	W	1	832439	832439	832439
YGR169C	7	835939	C	1	835877	835877	835877
YGR180C	7	856531	C	1	856588	856588	856588
YGR183C	7	859579	C	1	859530	859530	859530
YGR187C	7	871491	C	1	871428	871428	871428
YGR195W	7	888759	W	1	888816	888816	888816
YGR212W	7	916871	W	1	916831	916831	916831
YGR213C	7	919572	C	1	919614	919614	919614
YGR214W	7	920543	W	1	920568	920568	920568
YGR233C	7	958402	C	1	958442	958442	958442
YGR239C	7	970130	C	1	970118	970118	970118
YGR244C	7	979434	C	1	979393	979393	979393
YGR245C	7	982178	C	1	982113	982113	982113
YGR249W	7	987846	W	1	987816	987816	987816
YGR250C	7	993738	C	1	993714	993714	993714
YGR251W	7	995606	W	1	995635	995635	995635
YGR254W	7	1000894	W	1	1000867	1000867	1000867
YGR264C	7	1021906	C	1	1021853	1021853	1021853
YGR273C	7	1039346	C	1	1039277	1039277	1039277
YGR279C	7	1050082	C	1	1050046	1050046	1050046
YGR289C	7	1076154	C	1	1076118	1076118	1076118
YHL048W	8	6381	W	1	6441	6441	6441
YHL042W	8	15821	W	1	15884	15884	15884
YHL040C	8	21185	C	1	21151	21151	21151
YHL035C	8	32769	C	1	32759	32759	32759
YHL034C	8	34209	C	1	34154	34154	34154
YHL026C	8	54249	C	1	54298	54298	54298
YHL024W	8	56545	W	1	56564	56564	56564
YHL017W	8	70245	W	1	70302	70302	70302
YHL016C	8	74343	C	1	74274	74274	74274
YHL015W	8	75357	W	1	75420	75420	75420
YHL006C	8	98849	C	1	98874	98874	98874
YHR002W	8	108645	W	1	108700	108700	108700
YHR004C	8	113209	C	1	113171	113171	113171
YHR007C-A	8	122862	C	1	122869	122869	122869
YHR010W	8	126461	W	1	126524	126524	126524
YHR016C	8	138505	C	1	138470	138470	138470
YHR017W	8	138661	W	1	138724	138724	138724
YHR019C	8	143617	C	1	143565	143565	143565
YHR025W	8	159389	W	1	159440	159440	159440
YHR026W	8	160693	W	1	160758	160758	160758
YHR033W	8	175317	W	1	175356	175356	175356
YHR041C	8	189745	C	1	189818	189818	189818
YHR051W	8	209533	W	1	209586	209586	209586
YHR061C	8	222512	C	1	222447	222447	222447
YHR063C	8	225224	C	1	225176	225176	225176
YHR094C	8	292672	C	1	292654	292654	292654
YHR103W	8	320188	W	1	320207	320207	320207
YHR110W	8	332252	W	1	332314	332314	332314
YHR113W	8	336309	W	1	336371	336371	336371
YHR118C	8	345656	C	1	345597	345597	345597
YHR122W	8	353580	W	1	353609	353609	353609
YHR128W	8	362060	W	1	362051	362051	362051
YHR129C	8	364256	C	1	364198	364198	364198
YHR132C	8	369833	C	1	369789	369789	369789
YHR142W	8	383397	W	1	383455	383455	383455
YHR149C	8	396809	C	1	396749	396749	396749
YHR154W	8	402917	W	1	402976	402976	402976
YHR164C	8	429282	C	1	429239	429239	429239
YHR169W	8	442133	W	1	442152	442152	442152
YHR170W	8	443749	W	1	443808	443808	443808
YHR171W	8	445493	W	1	445472	445472	445472
YHR172W	8	448221	W	1	448262	448262	448262
YHR177W	8	456487	W	1	456537	456537	456537
YHR181W	8	467167	W	1	467238	467238	467238
YHR182W	8	468015	W	1	468050	468050	468050
YHR185C	8	475442	C	1	475401	475401	475401
YHR194W	8	488607	W	1	488638	488638	488638
YHR213W	8	539049	W	1	539077	539077	539077
YHR214W	8	541549	W	1	541525	541525	541525
YHR214C-D	8	551043	C	1	551080	551080	551080
YHR215W	8	551997	W	1	552007	552007	552007
YHR216W	8	554294	W	1	554365	554365	554365
YIL166C	9	32609	C	1	32555	32555	32555
YIL162W	9	37421	W	1	37472	37472	37472
YIL158W	9	46181	W	1	46205	46205	46205
YIL149C	9	68209	C	1	68153	68153	68153
YIL137C	9	92841	C	1	92774	92774	92774
YIL134C-A	9	96827	C	1	96862	96862	96862
YIL134W	9	97357	W	1	97381	97381	97381
YIL130W	9	102645	W	1	102688	102688	102688
YIL129C	9	113345	C	1	113289	113289	113289
YIL128W	9	113725	W	1	113763	113763	113763
YIL121W	9	132221	W	1	132181	132181	132181
YIL119C	9	138065	C	1	138059	138059	138059
YIL116W	9	142845	W	1	142840	142840	142840
YIL109C	9	160273	C	1	160200	160200	160200
YIL103W	9	171693	W	1	171746	171746	171746
YIL102C	9	174986	C	1	175043	175043	175043
YIL093C	9	188865	C	1	188805	188805	188805
YIL072W	9	226497	W	1	226528	226528	226528
YIL061C	9	245577	C	1	245542	245542	245542
YIL057C	9	248495	C	1	248490	248490	248490
YIL056W	9	249685	W	1	249727	249727	249727
YIL055C	9	254025	C	1	254093	254093	254093
YIL051C	9	258361	C	1	258303	258303	258303
YIL049W	9	260141	W	1	260190	260190	260190
YIL046W-A	9	268206	W	1	268195	268195	268195
YIL044C	9	273881	C	1	273835	273835	273835
YIL041W	9	276493	W	1	276554	276554	276554
YIL038C	9	282889	C	1	282850	282850	282850
YIL021W	9	312813	W	1	312880	312880	312880
YIL020C	9	314905	C	1	314843	314843	314843
YIL016W	9	321389	W	1	321459	321459	321459
YIR006C	9	369969	C	1	369909	369909	369909
YIR007W	9	370677	W	1	370662	370662	370662
YIR011C	9	378281	C	1	378217	378217	378217
YIR022W	9	398677	W	1	398743	398743	398743
YIR027C	9	407741	C	1	407749	407749	407749
YIR032C	9	415665	C	1	415644	415644	415644
YIR034C	9	420809	C	1	420748	420748	420748
YIR035C	9	421849	C	1	421798	421798	421798
YIR038C	9	424552	C	1	424500	424500	424500
YJL209W	10	37909	W	1	37967	37967	37967
YJL203W	10	53277	W	1	53345	53345	53345
YJL200C	10	58849	C	1	58905	58905	58905
YJL193W	10	71342	W	1	71408	71408	71408
YJL191W	10	73741	W	1	73801	73801	73801
YJL190C	10	75369	C	1	75313	75313	75313
YJL185C	10	83016	C	1	82981	82981	82981
YJL183W	10	83997	W	1	84044	84044	84044
YJL179W	10	88709	W	1	88766	88766	88766
YJL178C	10	90129	C	1	90068	90068	90068
YJL159W	10	120381	W	1	120308	120308	120308
YJL158C	10	122913	C	1	122963	122963	122963
YJL153C	10	135954	C	1	135994	135994	135994
YJL148W	10	140277	W	1	140335	140335	140335
YJL147C	10	142585	C	1	142528	142528	142528
YJL141C	10	150481	C	1	150420	150420	150420
YJL139C	10	153009	C	1	152980	152980	152980
YJL131C	10	165305	C	1	165243	165243	165243
YJL130C	10	172401	C	1	172384	172384	172384
YJL117W	10	192373	W	1	192408	192408	192408
YJL111W	10	207725	W	1	207780	207780	207780
YJL108C	10	218876	C	1	218870	218870	218870
YJL106W	10	221206	W	1	221205	221205	221205
YJL098W	10	241877	W	1	241817	241817	241817
YJL094C	10	254409	C	1	254364	254364	254364
YJL090C	10	265049	C	1	265005	265005	265005
YJL089W	10	265741	W	1	265716	265716	265716
YJL085W	10	272669	W	1	272724	272724	272724
YJL083W	10	278693	W	1	278750	278750	278750
YJL079C	10	290793	C	1	290792	290792	290792
YJL073W	10	302989	W	1	303049	303049	303049
YJL072C	10	305833	C	1	305771	305771	305771
YJL071W	10	305957	W	1	306027	306027	306027
YJL063C	10	316449	C	1	316377	316377	316377
YJL052W	10	338101	W	1	338128	338128	338128
YJL051W	10	339613	W	1	339593	339593	339593
YJL045W	10	355839	W	1	355829	355829	355829
YJL028W	10	391204	W	1	391169	391169	391169
YJL016W	10	405403	W	1	405456	405456	405456
YJL013C	10	410945	C	1	410891	410891	410891
YJL011C	10	414745	C	1	414681	414681	414681
YJL006C	10	424089	C	1	424020	424020	424020
YJR004C	10	444878	C	1	444859	444859	444859
YJR010W	10	455933	W	1	455924	455924	455924
YJR019C	10	468233	C	1	468189	468189	468189
YJR022W	10	469653	W	1	469720	469720	469720
YJR030C	10	486161	C	1	486182	486182	486182
YJR046W	10	521941	W	1	521941	521941	521941
YJR051W	10	529749	W	1	529782	529782	529782
YJR054W	10	535869	W	1	535917	535917	535917
YJR063W	10	555053	W	1	555108	555108	555108
YJR064W	10	555765	W	1	555833	555833	555833
YJR066W	10	559293	W	1	559348	559348	559348
YJR072C	10	572081	C	1	572015	572015	572015
YJR073C	10	572889	C	1	572846	572846	572846
YJR074W	10	573085	W	1	573086	573086	573086
YJR083C	10	583489	C	1	583424	583424	583424
YJR090C	10	594537	C	1	594486	594486	594486
YJR098C	10	615161	C	1	615103	615103	615103
YJR120W	10	647294	W	1	647323	647323	647323
YJR121W	10	647294	W	1	647323	647323	647323
YJR122W	10	649629	W	1	649632	649632	649632
YJR132W	10	669381	W	1	669422	669422	669422
YJR152W	10	719480	W	1	719544	719544	719544
YJR155W	10	727219	W	1	727283	727283	727283
YJR159W	10	735858	W	1	735808	735808	735808
YKL222C	11	5761	C	1	5714	5714	5714
YKL220C	11	11329	C	1	11326	11326	11326
YKL218C	11	18497	C	1	18457	18457	18457
YKL214C	11	31777	C	1	31713	31713	31713
YKL210W	11	39109	W	1	39165	39165	39165
YKL204W	11	53669	W	1	53722	53722	53722
YKL203C	11	63548	C	1	63496	63496	63496
YKL196C	11	75612	C	1	75550	75550	75550
YKL194C	11	78668	C	1	78614	78614	78614
YKL192C	11	80588	C	1	80530	80530	80530
YKL191W	11	81008	W	1	81056	81056	81056
YKL190W	11	82904	W	1	82966	82966	82966
YKL185W	11	94160	W	1	94191	94191	94191
YKL184W	11	96592	W	1	96607	96607	96607
YKL178C	11	114734	C	1	114695	114695	114695
YKL174C	11	122348	C	1	122281	122281	122281
YKL161C	11	150892	C	1	150953	150953	150953
YKL148C	11	171316	C	1	171311	171311	171311
YKL140W	11	180568	W	1	180555	180555	180555
YKL130C	11	196100	C	1	196057	196057	196057
YKL129C	11	200588	C	1	200609	200609	200609
YKL127W	11	203136	W	1	203184	203184	203184
YKL120W	11	216856	W	1	216913	216913	216913
YKL110C	11	229596	C	1	229542	229542	229542
YKL107W	11	235683	W	1	235700	235700	235700
YKL106C-A	11	237012	C	1	236955	236955	236955
YKL106W	11	237056	W	1	237122	237122	237122
YKL099C	11	256188	C	1	256141	256141	256141
YKL098W	11	256368	W	1	256412	256412	256412
YKL093W	11	264000	W	1	263964	263964	263964
YKL090W	11	271504	W	1	271552	271552	271552
YKL085W	11	278624	W	1	278682	278682	278682
YKL081W	11	282480	W	1	282522	282522	282522
YKL073W	11	296032	W	1	296086	296086	296086
YKL072W	11	299024	W	1	299050	299050	299050
YKL059C	11	329164	C	1	329110	329110	329110
YKL056C	11	334628	C	1	334557	334557	334557
YKL051W	11	340488	W	1	340541	340541	340541
YKL050C	11	345366	C	1	345407	345407	345407
YKL046C	11	352500	C	1	352471	352471	352471
YKL045W	11	353064	W	1	353114	353114	353114
YKL028W	11	385360	W	1	385415	385415	385415
YKL027W	11	387103	W	1	387131	387131	387131
YKL024C	11	393052	C	1	393008	393008	393008
YKL010C	11	425628	C	1	425585	425585	425585
YKL006W	11	431512	W	1	431564	431564	431564
YKL002W	11	437344	W	1	437396	437396	437396
YKR002W	11	442672	W	1	442673	442673	442673
YKR011C	11	462452	C	1	462397	462397	462397
YKR014C	11	465868	C	1	465810	465810	465810
YKR019C	11	477804	C	1	477767	477767	477767
YKR024C	11	487052	C	1	487028	487028	487028
YKR028W	11	493528	W	1	493566	493566	493566
YKR043C	11	521388	C	1	521338	521338	521338
YKR046C	11	525108	C	1	525123	525123	525123
YKR051W	11	530456	W	1	530504	530504	530504
YKR056W	11	549208	W	1	549263	549263	549263
YKR058W	11	552360	W	1	552293	552293	552293
YKR061W	11	557217	W	1	557255	557255	557255
YKR063C	11	561972	C	1	561900	561900	561900
YKR064W	11	562120	W	1	562191	562191	562191
YKR065C	11	565572	C	1	565509	565509	565509
YKR072C	11	577924	C	1	577909	577909	577909
YKR074W	11	578824	W	1	578857	578857	578857
YKR076W	11	581848	W	1	581875	581875	581875
YKR081C	11	592212	C	1	592164	592164	592164
YKR089C	11	608077	C	1	608049	608049	608049
YKR090W	11	608417	W	1	608479	608479	608479
YKR093W	11	615258	W	1	615235	615235	615235
YKR102W	11	645892	W	1	645938	645938	645938
YKR104W	11	656372	W	1	656361	656361	656361
YKR105C	11	660204	C	1	660195	660195	660195
YLL063C	12	16041	C	1	15989	15989	15989
YLL052C	12	36462	C	1	36443	36443	36443
YLL049W	12	40645	W	1	40689	40689	40689
YLL048C	12	46457	C	1	46419	46419	46419
YLL045C	12	48665	C	1	48596	48596	48596
YLL042C	12	52624	C	1	52573	52573	52573
YLL035W	12	68445	W	1	68476	68476	68476
YLL029W	12	81341	W	1	81378	81378	81378
YLL026W	12	88549	W	1	88494	88494	88494
YLL021W	12	100797	W	1	100841	100841	100841
YLL012W	12	125477	W	1	125512	125512	125512
YLL011W	12	127493	W	1	127563	127563	127563
YLL008W	12	131693	W	1	131728	131728	131728
YLL004W	12	141053	W	1	141116	141116	141116
YLR003C	12	157769	C	1	157712	157712	157712
YLR011W	12	168997	W	1	169037	169037	169037
YLR014C	12	175017	C	1	174985	174985	174985
YLR015W	12	175165	W	1	175232	175232	175232
YLR018C	12	179681	C	1	179627	179627	179627
YLR019W	12	179973	W	1	180041	180041	180041
YLR020C	12	183449	C	1	183387	183387	183387
YLR021W	12	183573	W	1	183646	183646	183646
YLR024C	12	193497	C	1	193431	193431	193431
YLR035C	12	214449	C	1	214439	214439	214439
YLR038C	12	225233	C	1	225203	225203	225203
YLR042C	12	230545	C	1	230565	230565	230565
YLR046C	12	238916	C	1	238848	238848	238848
YLR049C	12	245353	C	1	245344	245344	245344
YLR056W	12	253781	W	1	253743	253743	253743
YLR063W	12	264221	W	1	264244	264244	264244
YLR067C	12	270809	C	1	270761	270761	270761
YLR070C	12	275257	C	1	275217	275217	275217
YLR072W	12	278845	W	1	278882	278882	278882
YLR077W	12	283829	W	1	283898	283898	283898
YLR084C	12	300401	C	1	300348	300348	300348
YLR086W	12	302189	W	1	302234	302234	302234
YLR090W	12	320653	W	1	320686	320686	320686
YLR092W	12	323443	W	1	323398	323398	323398
YLR099C	12	340953	C	1	340993	340993	340993
YLR102C	12	343969	C	1	344009	344009	344009
YLR105C	12	348225	C	1	348156	348156	348156
YLR121C	12	390297	C	1	390346	390346	390346
YLR125W	12	393383	W	1	393429	393429	393429
YLR139C	12	423513	C	1	423441	423441	423441
YLR154C-H	12	469061	C	1	469130	469130	469130
YLR155C	12	470508	C	1	470468	470468	470468
YLR156C-A	12	472713	C	1	472751	472751	472751
YLR157C	12	474160	C	1	474120	474120	474120
YLR159W	12	485244	W	1	485205	485205	485205
YLR161W	12	488896	W	1	488867	488867	488867
YLR166C	12	498049	C	1	498042	498042	498042
YLR167W	12	498853	W	1	498907	498907	498907
YLR182W	12	517885	W	1	517956	517956	517956
YLR185W	12	522629	W	1	522695	522695	522695
YLR191W	12	537229	W	1	537277	537277	537277
YLR192C	12	539681	C	1	539630	539630	539630
YLR194C	12	541677	C	1	541739	541739	541739
YLR196W	12	543885	W	1	543941	543941	543941
YLR203C	12	552073	C	1	552002	552002	552002
YLR204W	12	552237	W	1	552290	552290	552290
YLR207W	12	556733	W	1	556762	556762	556762
YLR210W	12	561949	W	1	561980	561980	561980
YLR214W	12	568445	W	1	568436	568436	568436
YLR216C	12	573265	C	1	573203	573203	573203
YLR218C	12	573817	C	1	573745	573745	573745
YLR221C	12	579081	C	1	579013	579013	579013
YLR231C	12	607153	C	1	607110	607110	607110
YLR234W	12	609749	W	1	609790	609790	609790
YLR248W	12	634181	W	1	634240	634240	634240
YLR249W	12	636741	W	1	636733	636733	636733
YLR268W	12	680133	W	1	680203	680203	680203
YLR275W	12	694477	W	1	694535	694535	694535
YLR276C	12	696937	C	1	696910	696910	696910
YLR287C	12	712129	C	1	712069	712069	712069
YLR287C-A	12	713233	C	1	713162	713162	713162
YLR293C	12	721521	C	1	721458	721458	721458
YLR298C	12	725441	C	1	725392	725392	725392
YLR303W	12	732485	W	1	732415	732415	732415
YLR340W	12	805819	W	1	805856	805856	805856
YLR342W	12	809731	W	1	809780	809780	809780
YLR345W	12	820235	W	1	820219	820219	820219
YLR356W	12	840259	W	1	840279	840279	840279
YLR376C	12	873599	C	1	873564	873564	873564
YLR394W	12	907848	W	1	907880	907880	907880
YLR403W	12	925465	W	1	925452	925452	925452
YLR404W	12	928707	W	1	928767	928767	928767
YLR406C-A	12	932456	C	1	932490	932490	932490
YLR409C	12	937287	C	1	937220	937220	937220
YLR414C	12	954279	C	1	954260	954260	954260
YLR415C	12	954279	C	1	954260	954260	954260
YLR417W	12	954899	W	1	954954	954954	954954
YLR443W	12	1022467	W	1	1022524	1022524	1022524
YLR446W	12	1025123	W	1	1025191	1025191	1025191
YLR450W	12	1032443	W	1	1032439	1032439	1032439
YLR451W	12	1035995	W	1	1036054	1036054	1036054
YLR453C	12	1043023	C	1	1042999	1042999	1042999
YLR460C	12	1061079	C	1	1061044	1061044	1061044
YLR461W	12	1062815	W	1	1062843	1062843	1062843
YML123C	13	25857	C	1	25787	25787	25787
YML119W	13	30573	W	1	30534	30534	30534
YML115C	13	41865	C	1	41798	41798	41798
YML113W	13	43997	W	1	44045	44045	44045
YML107C	13	56281	C	1	56236	56236	56236
YML106W	13	56461	W	1	56519	56519	56519
YML100W	13	70566	W	1	70511	70511	70511
YML097C	13	79729	C	1	79662	79662	79662
YML093W	13	83069	W	1	83124	83124	83124
YML080W	13	108685	W	1	108755	108755	108755
YML076C	13	115377	C	1	115313	115313	115313
YML074C	13	121369	C	1	121302	121302	121302
YML073C	13	124225	C	1	124164	124164	124164
YML072C	13	129537	C	1	129537	129537	129537
YML063W	13	146413	W	1	146478	146478	146478
YML062C	13	148728	C	1	148667	148667	148667
YML058W	13	159325	W	1	159394	159394	159394
YML050W	13	172917	W	1	172978	172978	172978
YML046W	13	181421	W	1	181430	181430	181430
YML022W	13	228869	W	1	228938	228938	228938
YML020W	13	230965	W	1	231025	231025	231025
YML018C	13	236105	C	1	236038	236038	236038
YML016C	13	241801	C	1	241771	241771	241771
YML013W	13	243957	W	1	243901	243901	243901
YML012W	13	246053	W	1	246090	246090	246090
YML011C	13	247481	C	1	247417	247417	247417
YMR004W	13	273949	W	1	273990	273990	273990
YMR016C	13	305873	C	1	305816	305816	305816
YMR023C	13	321017	C	1	321002	321002	321002
YMR024W	13	321877	W	1	321941	321941	321941
YMR026C	13	325553	C	1	325556	325556	325556
YMR032W	13	335197	W	1	335231	335231	335231
YMR033W	13	337741	W	1	337796	337796	337796
YMR034C	13	340945	C	1	340879	340879	340879
YMR042W	13	352501	W	1	352571	352571	352571
YMR048W	13	366957	W	1	367008	367008	367008
YMR049C	13	370561	C	1	370496	370496	370496
YMR055C	13	387065	C	1	386997	386997	386997
YMR062C	13	396409	C	1	396407	396407	396407
YMR063W	13	397013	W	1	397062	397062	397062
YMR065W	13	399853	W	1	399880	399880	399880
YMR087W	13	442085	W	1	442048	442048	442048
YMR095C	13	458060	C	1	458076	458076	458076
YMR100W	13	465934	W	1	465948	465948	465948
YMR102C	13	472521	C	1	472472	472472	472472
YMR108W	13	483821	W	1	483894	483894	483894
YMR114C	13	497497	C	1	497451	497451	497451
YMR116C	13	500721	C	1	500743	500743	500743
YMR118C	13	502835	C	1	502815	502815	502815
YMR121C	13	510393	C	1	510329	510329	510329
YMR122W-A	13	511212	W	1	511229	511229	511229
YMR123W	13	513541	W	1	513597	513597	513597
YMR139W	13	545893	W	1	545939	545939	545939
YMR145C	13	556689	C	1	556671	556671	556671
YMR154C	13	568217	C	1	568193	568193	568193
YMR156C	13	571425	C	1	571368	571368	571368
YMR158C-A	13	573432	C	1	573442	573442	573442
YMR163C	13	586537	C	1	586467	586467	586467
YMR168C	13	599209	C	1	599148	599148	599148
YMR172W	13	606101	W	1	606107	606107	606107
YMR179W	13	619797	W	1	619748	619748	619748
YMR182C	13	625233	C	1	625275	625275	625275
YMR186W	13	632309	W	1	632354	632354	632354
YMR187C	13	636065	C	1	636029	636029	636029
YMR191W	13	645629	W	1	645652	645652	645652
YMR193W	13	649981	W	1	650045	650045	650045
YMR194W	13	651101	W	1	651167	651167	651167
YMR194C-B	13	652988	C	1	652916	652916	652916
YMR198W	13	659461	W	1	659508	659508	659508
YMR200W	13	664621	W	1	664670	664670	664670
YMR204C	13	671353	C	1	671330	671330	671330
YMR212C	13	693185	C	1	693113	693113	693113
YMR217W	13	701677	W	1	701749	701749	701749
YMR219W	13	707077	W	1	707136	707136	707136
YMR223W	13	716485	W	1	716546	716546	716546
YMR229C	13	731225	C	1	731170	731170	731170
YMR232W	13	736823	W	1	736800	736800	736800
YMR236W	13	742925	W	1	742998	742998	742998
YMR239C	13	749753	C	1	749704	749704	749704
YMR243C	13	756289	C	1	756237	756237	756237
YMR251W	13	772812	W	1	772828	772828	772828
YMR262W	13	793693	W	1	793740	793740	793740
YMR273C	13	814161	C	1	814131	814131	814131
YMR276W	13	818773	W	1	818839	818839	818839
YMR280C	13	831430	C	1	831407	831407	831407
YMR288W	13	845541	W	1	845610	845610	845610
YMR290C	13	851633	C	1	851592	851592	851592
YMR291W	13	852557	W	1	852602	852602	852602
YMR306W	13	880821	W	1	880858	880858	880858
YMR310C	13	896737	C	1	896694	896694	896694
YMR312W	13	898365	W	1	898432	898432	898432
YMR318C	13	912257	C	1	912187	912187	912187
YNL335W	14	11350	W	1	11338	11338	11338
YNL332W	14	14730	W	1	14798	14798	14798
YNL320W	14	37621	W	1	37674	37674	37674
YNL318C	14	40430	C	1	40381	40381	40381
YNL316C	14	43145	C	1	43073	43073	43073
YNL308C	14	55929	C	1	55888	55888	55888
YNL304W	14	60269	W	1	60300	60300	60300
YNL299W	14	66421	W	1	66493	66493	66493
YNL288W	14	90157	W	1	90213	90213	90213
YNL283C	14	107145	C	1	107153	107153	107153
YNL273W	14	122829	W	1	122877	122877	122877
YNL269W	14	137598	W	1	137628	137628	137628
YNL264C	14	146649	C	1	146582	146582	146582
YNL260C	14	157385	C	1	157356	157356	157356
YNL255C	14	167825	C	1	167789	167789	167789
YNL251C	14	174601	C	1	174578	174578	174578
YNL249C	14	181233	C	1	181225	181225	181225
YNL244C	14	187521	C	1	187504	187504	187504
YNL242W	14	190941	W	1	190951	190951	190951
YNL241C	14	198001	C	1	198043	198043	198043
YNL230C	14	218697	C	1	218698	218698	218698
YNL225C	14	224513	C	1	224473	224473	224473
YNL223W	14	227357	W	1	227397	227397	227397
YNL200C	14	264593	C	1	264523	264523	264523
YNL196C	14	271001	C	1	271013	271013	271013
YNL192W	14	276341	W	1	276390	276390	276390
YNL190W	14	282125	W	1	282166	282166	282166
YNL189W	14	284045	W	1	284104	284104	284104
YNL175C	14	308665	C	1	308608	308608	308608
YNL173C	14	310113	C	1	310164	310164	310164
YNL164C	14	326497	C	1	326435	326435	326435
YNL163C	14	330121	C	1	330099	330099	330099
YNL153C	14	346097	C	1	346049	346049	346049
YNL149C	14	349809	C	1	349765	349765	349765
YNL146W	14	351397	W	1	351412	351412	351412
YNL141W	14	359549	W	1	359568	359568	359568
YNL139C	14	365825	C	1	365780	365780	365780
YNL137C	14	370161	C	1	370114	370114	370114
YNL132W	14	375229	W	1	375266	375266	375266
YNL130C	14	380873	C	1	380834	380834	380834
YNL129W	14	381381	W	1	381337	381337	381337
YNL128W	14	382259	W	1	382324	382324	382324
YNL124W	14	392861	W	1	392905	392905	392905
YNL122C	14	398353	C	1	398298	398298	398298
YNL121C	14	400585	C	1	400541	400541	400541
YNL117W	14	406258	W	1	406213	406213	406213
YNL111C	14	417513	C	1	417463	417463	417463
YNL106C	14	424809	C	1	424846	424846	424846
YNL101W	14	434789	W	1	434858	434858	434858
YNL094W	14	447333	W	1	447333	447333	447333
YNL093W	14	449768	W	1	449819	449819	449819
YNL088W	14	457333	W	1	457379	457379	457379
YNL080C	14	478217	C	1	478150	478150	478150
YNL077W	14	481005	W	1	480964	480964	480964
YNL076W	14	483285	W	1	483339	483339	483339
YNL074C	14	488185	C	1	488123	488123	488123
YNL072W	14	490285	W	1	490338	490338	490338
YNL068C	14	498521	C	1	498471	498471	498471
YNL067W-B	14	499316	W	1	499349	499349	499349
YNL066W	14	501501	W	1	501485	501485	501485
YNL065W	14	503629	W	1	503630	503630	503630
YNL044W	14	545182	W	1	545239	545239	545239
YNL042W-B	14	547012	W	1	546959	546959	546959
YNL042W	14	547926	W	1	547927	547927	547927
YNL040W	14	553350	W	1	553408	553408	553408
YNL024C	14	587866	C	1	587924	587924	587924
YNL021W	14	593157	W	1	593157	593157	593157
YNL019C	14	599333	C	1	599338	599338	599338
YNL014W	14	606502	W	1	606453	606453	606453
YNL007C	14	619722	C	1	619705	619705	619705
YNL005C	14	622482	C	1	622437	622437	622437
YNL004W	14	623286	W	1	623273	623273	623273
YNL002C	14	627186	C	1	627121	627121	627121
YNR003C	14	635330	C	1	635287	635287	635287
YNR009W	14	642662	W	1	642620	642620	642620
YNR012W	14	647342	W	1	647390	647390	647390
YNR014W	14	652414	W	1	652392	652392	652392
YNR015W	14	653366	W	1	653428	653428	653428
YNR019W	14	665286	W	1	665347	665347	665347
YNR027W	14	674878	W	1	674938	674938	674938
YNR040W	14	699670	W	1	699724	699724	699724
YNR045W	14	706102	W	1	706155	706155	706155
YNR046W	14	707734	W	1	707787	707787	707787
YNR053C	14	723162	C	1	723128	723128	723128
YNR055C	14	730650	C	1	730588	730588	730588
YNR059W	14	736702	W	1	736684	736684	736684
YNR065C	14	753802	C	1	753806	753806	753806
YNR068C	14	760987	C	1	760970	760970	760970
YOL166W-A	15	483	W	1	423	423	423
YOL161C	15	12012	C	1	11981	11981	11981
YOL158C	15	21441	C	1	21392	21392	21392
YOL154W	15	34381	W	1	34404	34404	34404
YOL149W	15	44909	W	1	44970	44970	44970
YOL147C	15	48673	C	1	48632	48632	48632
YOL142W	15	55525	W	1	55590	55590	55590
YOL139C	15	61113	C	1	61070	61070	61070
YOL136C	15	69009	C	1	68958	68958	68958
YOL121C	15	92897	C	1	92858	92858	92858
YOL120C	15	94433	C	1	94383	94383	94383
YOL116W	15	99677	W	1	99706	99706	99706
YOL104C	15	117742	C	1	117705	117705	117705
YOL097W-A	15	136118	W	1	136125	136125	136125
YOL096C	15	139097	C	1	139028	139028	139028
YOL092W	15	144165	W	1	144219	144219	144219
YOL081W	15	170765	W	1	170704	170704	170704
YOL073C	15	194833	C	1	194773	194773	194773
YOL068C	15	201981	C	1	202046	202046	202046
YOL059W	15	217117	W	1	217063	217063	217063
YOL052C-A	15	231856	C	1	231834	231834	231834
YOL049W	15	238565	W	1	238622	238622	238622
YOL044W	15	247077	W	1	247138	247138	247138
YOL042W	15	249757	W	1	249804	249804	249804
YOL040C	15	253633	C	1	253579	253579	253579
YOL031C	15	267601	C	1	267546	267546	267546
YOL017W	15	292469	W	1	292449	292449	292449
YOL013W-A	15	300946	W	1	300953	300953	300953
YOL013C	15	303176	C	1	303145	303145	303145
YOL006C	15	315529	C	1	315458	315458	315458
YOL003C	15	323025	C	1	322953	322953	322953
YOR016C	15	361217	C	1	361153	361153	361153
YOR020W-A	15	371583	W	1	371511	371511	371511
YOR023C	15	377801	C	1	377804	377804	377804
YOR031W	15	389111	W	1	389051	389051	389051
YOR033C	15	394626	C	1	394637	394637	394637
YOR034C-A	15	397770	C	1	397791	397791	397791
YOR035C	15	400137	C	1	400083	400083	400083
YOR038C	15	405441	C	1	405387	405387	405387
YOR047C	15	417833	C	1	417776	417776	417776
YOR058C	15	436505	C	1	436453	436453	436453
YOR077W	15	471853	W	1	471915	471915	471915
YOR078W	15	472709	W	1	472736	472736	472736
YOR089C	15	490905	C	1	490840	490840	490840
YOR093C	15	502497	C	1	502476	502476	502476
YOR096W	15	505725	W	1	505769	505769	505769
YOR098C	15	511257	C	1	511190	511190	511190
YOR106W	15	519029	W	1	519100	519100	519100
YOR109W	15	525149	W	1	525175	525175	525175
YOR110W	15	528877	W	1	528894	528894	528894
YOR113W	15	533957	W	1	534026	534026	534026
YOR116C	15	544377	C	1	544341	544341	544341
YOR131C	15	572929	C	1	572866	572866	572866
YOR136W	15	580133	W	1	580080	580080	580080
YOR145C	15	606209	C	1	606169	606169	606169
YOR147W	15	606549	W	1	606606	606606	606606
YOR152C	15	618391	C	1	618421	618421	618421
YOR154W	15	624661	W	1	624716	624716	624716
YOR161C	15	638721	C	1	638712	638712	638712
YOR164C	15	644377	C	1	644321	644321	644321
YOR173W	15	657085	W	1	657032	657032	657032
YOR175C	15	661769	C	1	661704	661704	661704
YOR180C	15	675270	C	1	675197	675197	675197
YOR182C	15	678849	C	1	678784	678784	678784
YOR187W	15	683901	W	1	683938	683938	683938
YOR188W	15	685685	W	1	685740	685740	685740
YOR198C	15	720249	C	1	720226	720226	720226
YOR204W	15	722877	W	1	722933	722933	722933
YOR208W	15	733701	W	1	733744	733744	733744
YOR210W	15	738269	W	1	738336	738336	738336
YOR211C	15	741777	C	1	741713	741713	741713
YOR213C	15	745393	C	1	745351	745351	745351
YOR215C	15	747321	C	1	747267	747267	747267
YOR216C	15	749033	C	1	748996	748996	748996
YOR222W	15	757853	W	1	757840	757840	757840
YOR236W	15	780885	W	1	780955	780955	780955
YOR237W	15	781797	W	1	781823	781823	781823
YOR238W	15	783576	W	1	783511	783511	783511
YOR244W	15	792461	W	1	792517	792517	792517
YOR260W	15	813925	W	1	813987	813987	813987
YOR264W	15	818805	W	1	818878	818878	818878
YOR266W	15	820686	W	1	820747	820747	820747
YOR267C	15	825273	C	1	825239	825239	825239
YOR268C	15	826033	C	1	826068	826068	826068
YOR270C	15	830761	C	1	830706	830706	830706
YOR279C	15	844745	C	1	844692	844692	844692
YOR299W	15	878301	W	1	878359	878359	878359
YOR305W	15	888933	W	1	889003	889003	889003
YOR306C	15	891633	C	1	891687	891687	891687
YOR308C	15	896401	C	1	896381	896381	896381
YOR315W	15	904661	W	1	904616	904616	904616
YOR322C	15	921305	C	1	921247	921247	921247
YOR334W	15	944573	W	1	944599	944599	944599
YOR342C	15	967745	C	1	967718	967718	967718
YOR344C	15	978209	C	1	978240	978240	978240
YOR346W	15	981637	W	1	981696	981696	981696
YOR348C	15	988881	C	1	988860	988860	988860
YOR352W	15	997109	W	1	997153	997153	997153
YOR353C	15	1000873	C	1	1000816	1000816	1000816
YOR356W	15	1007149	W	1	1007140	1007140	1007140
YOR359W	15	1011093	W	1	1011094	1011094	1011094
YOR376W-A	15	1045092	W	1	1045114	1045114	1045114
YOR377W	15	1046157	W	1	1046222	1046222	1046222
YOR381W	15	1055441	W	1	1055385	1055385	1055385
YOR381W-A	15	1058319	W	1	1058388	1058388	1058388
YOR391C	15	1079358	C	1	1079381	1079381	1079381
YOR393W	15	1080172	W	1	1080142	1080142	1080142
YPL281C	16	10972	C	1	11001	11001	11001
YPL271W	16	30045	W	1	30105	30105	30105
YPL265W	16	40925	W	1	40916	40916	40916
YPL260W	16	49198	W	1	49255	49255	49255
YPL256C	16	66793	C	1	66758	66758	66758
YPL252C	16	73945	C	1	73892	73892	73892
YPL247C	16	84545	C	1	84540	84540	84540
YPL239W	16	99389	W	1	99451	99451	99451
YPL235W	16	103117	W	1	103189	103189	103189
YPL233W	16	106109	W	1	106146	106146	106146
YPL232W	16	107101	W	1	107164	107164	107164
YPL231W	16	108573	W	1	108626	108626	108626
YPL228W	16	118237	W	1	118289	118289	118289
YPL227C	16	121313	C	1	121250	121250	121250
YPL219W	16	136709	W	1	136707	136707	136707
YPL218W	16	138621	W	1	138681	138681	138681
YPL210C	16	156241	C	1	156189	156189	156189
YPL203W	16	166085	W	1	166108	166108	166108
YPL196W	16	174989	W	1	174997	174997	174997
YPL193W	16	181357	W	1	181383	181383	181383
YPL192C	16	183157	C	1	183230	183230	183230
YPL191C	16	184729	C	1	184668	184668	184668
YPL189C-A	16	188614	C	1	188569	188569	188569
YPL188W	16	191365	W	1	191430	191430	191430
YPL181W	16	203230	W	1	203220	203220	203220
YPL174C	16	222905	C	1	222889	222889	222889
YPL170W	16	228205	W	1	228223	228223	228223
YPL168W	16	231069	W	1	231113	231113	231113
YPL165C	16	239178	C	1	239209	239209	239209
YPL153C	16	264385	C	1	264317	264317	264317
YPL148C	16	272961	C	1	272891	272891	272891
YPL143W	16	282053	W	1	282105	282105	282105
YPL137C	16	296929	C	1	296990	296990	296990
YPL126W	16	310157	W	1	310224	310224	310224
YPL121C	16	321731	C	1	321675	321675	321675
YPL119C-A	16	324388	C	1	324377	324377	324377
YPL116W	16	329413	W	1	329414	329414	329414
YPL115C	16	335705	C	1	335708	335708	335708
YPL113C	16	337457	C	1	337416	337416	337416
YPL111W	16	339893	W	1	339891	339891	339891
YPL110C	16	344889	C	1	344899	344899	344899
YPL107W	16	349014	W	1	349063	349063	349063
YPL099C	16	364091	C	1	364039	364039	364039
YPL096W	16	366895	W	1	366959	366959	366959
YPL093W	16	370895	W	1	370958	370958	370958
YPL092W	16	373639	W	1	373652	373652	373652
YPL088W	16	381860	W	1	381842	381842	381842
YPL081W	16	404895	W	1	404968	404968	404968
YPL079W	16	406591	W	1	406638	406638	406638
YPL078C	16	408811	C	1	408768	408768	408768
YPL067C	16	425899	C	1	425869	425869	425869
YPL065W	16	427895	W	1	427959	427959	427959
YPL064C	16	429643	C	1	429587	429587	429587
YPL063W	16	429807	W	1	429867	429867	429867
YPL060W	16	434143	W	1	434080	434080	434080
YPL054W	16	455654	W	1	455688	455688	455688
YPL051W	16	459927	W	1	459992	459992	459992
YPL048W	16	464311	W	1	464333	464333	464333
YPL047W	16	465879	W	1	465903	465903	465903
YPL045W	16	467159	W	1	467204	467204	467204
YPL042C	16	474947	C	1	474923	474923	474923
YPL032C	16	491563	C	1	491532	491532	491532
YPL030W	16	493479	W	1	493531	493531	493531
YPL028W	16	497983	W	1	498039	498039	498039
YPL023C	16	506451	C	1	506395	506395	506395
YPL018W	16	517615	W	1	517672	517672	517672
YPL014W	16	527519	W	1	527523	527523	527523
YPL004C	16	551723	C	1	551703	551703	551703
YPR001W	16	556272	W	1	556278	556278	556278
YPR007C	16	571477	C	1	571471	571471	571471
YPR009W	16	576447	W	1	576433	576433	576433
YPR010C	16	581251	C	1	581206	581206	581206
YPR010C-A	16	582833	C	1	582817	582817	582817
YPR029C	16	627019	C	1	626980	626980	626980
YPR030W	16	627775	W	1	627712	627712	627712
YPR035W	16	642063	W	1	642100	642100	642100
YPR036W-A	16	645845	W	1	645822	645822	645822
YPR041W	16	648591	W	1	648632	648632	648632
YPR073C	16	692483	C	1	692427	692427	692427
YPR074C	16	694946	C	1	694968	694968	694968
YPR075C	16	696875	C	1	696825	696825	696825
YPR098C	16	729571	C	1	729517	729517	729517
YPR100W	16	729751	W	1	729800	729800	729800
YPR106W	16	740015	W	1	740055	740055	740055
YPR110C	16	746875	C	1	746806	746806	746806
YPR111W	16	747279	W	1	747267	747267	747267
YPR119W	16	771295	W	1	771294	771294	771294
YPR120C	16	775307	C	1	775289	775289	775289
YPR140W	16	814287	W	1	814337	814337	814337
YPR143W	16	818279	W	1	818337	818337	818337
YPR145W	16	822559	W	1	822573	822573	822573
YPR151C	16	831773	C	1	831785	831785	831785
YPR155C	16	837483	C	1	837434	837434	837434
YPR156C	16	840083	C	1	840101	840101	840101
YPR158W	16	843175	W	1	843217	843217	843217
YPR163C	16	870051	C	1	869986	869986	869986
YPR165W	16	875151	W	1	875174	875174	875174
YPR182W	16	900119	W	1	900164	900164	900164
YPR190C	16	919083	C	1	919019	919019	919019
YLL034C	12	73201	C	2	73152	73153.5	73150.5
YKL143W	11	176744	W	2	176779	176777	176781
YCL008C	3	106881	C	2	106807	106810	106804
YDR159W	4	771758	W	2	771830	771828	771832
YBR114W	2	467188	W	2	467219	467216	467222
YDR341C	4	1153675	C	2	1153610	1153613	1153607
YGR078C	7	640419	C	2	640370	640373	640367
YHR135C	8	374441	C	2	374381	374384	374378
YJL049W	10	345869	W	2	345911	345908	345914
YKR085C	11	599356	C	2	599284	599287	599281
YLR002C	12	156377	C	2	156328	156331	156325
YLR181C	12	517761	C	2	517696	517699	517693
YLR226W	12	589309	W	2	589371	589368	589374
YNL181W	14	298253	W	2	298308	298305	298311
YNR057C	14	733834	C	2	733765	733768	733762
YOR276W	15	841269	W	2	841336	841333	841339
YPR178W	16	892287	W	2	892328	892325	892331
YBR079C	2	398303	C	2	398250	398254	398246
YBR142W	2	528236	W	2	528291	528288	528294
YBR169C	2	576016	C	2	576071	576074	576068
YBR253W	2	723204	W	2	723259	723256	723262
YCL045C	3	46969	C	2	46898	46901.5	46894.5
YDL116W	4	251501	W	2	251555	251552	251558
YDR161W	4	778982	W	2	779033	779030	779036
YDR167W	4	789406	W	2	789470	789466	789474
YFR024C-A	6	203457	C	2	203399	203402	203396
YHR089C	8	283376	C	2	283306	283310	283302
YKL023W	11	393344	W	2	393388	393384	393392
YML129C	13	14793	C	2	14724	14727.5	14720.5
YMR144W	13	553221	W	2	553267	553264	553270
YOR073W	15	464693	W	2	464758	464754	464762
YPL055C	16	455003	C	2	454948	454952	454944
YAL064W	1	21424	W	2	21405	21401	21409
YBR131W	2	497132	W	2	497160	497156	497164
YCR048W	3	211869	W	2	211898	211894	211902
YCR072C	3	242385	C	2	242322	242326	242318
YCR088W	3	265013	W	2	265082	265078	265086
YCR094W	3	286693	W	2	286746	286742	286750
YDL117W	4	248197	W	2	248237	248233	248241
YDR519W	4	1480343	W	2	1480414	1480410	1480418
YGL023C	7	452155	C	2	452090	452094	452086
YGR173W	7	843807	W	2	843844	843840	843848
YHR042W	8	190477	W	2	190526	190522	190530
YLR117C	12	384785	C	2	384784	384788	384780
YLR129W	12	399605	W	2	399677	399673	399681
YLR357W	12	841275	W	2	841342	841338	841346
YMR133W	13	536104	W	2	536046	536042	536050
YNL166C	14	323601	C	2	323552	323556	323548
YOR127W	15	560893	W	2	560935	560931	560939
YBL037W	2	147115	W	2	147169	147164	147174
YBL014C	2	201791	C	2	201734	201738	201730
YBR059C	2	360320	C	2	360270	360274	360266
YCL055W	3	27893	W	2	27949	27944.5	27953.5
YDL173W	4	148149	W	2	148207	148202	148212
YDL164C	4	167305	C	2	167261	167266	167256
YDR005C	4	458241	C	2	458181	458186	458176
YDR168W	4	790286	W	2	790319	790314	790324
YDR200C	4	856147	C	2	856102	856106	856098
YDR234W	4	931023	W	2	930984	930980	930988
YDR365C	4	1206435	C	2	1206383	1.20639e+06	1.20638e+06
YDR505C	4	1459475	C	2	1459409	1.45941e+06	1.4594e+06
YEL031W	5	90221	W	2	90259	90254.5	90263.5
YEL006W	5	144269	W	2	144310	144306	144314
YFR040W	6	233925	W	2	233981	233976	233986
YGL245W	7	38989	W	2	39054	39049.5	39058.5
YGR261C	7	1016810	C	2	1016736	1.01674e+06	1.01673e+06
YIL030C	9	300073	C	2	300028	300032	300024
YLR272C	12	687288	C	2	687229	687234	687224
YLR442C	12	1022294	C	2	1022255	1.02226e+06	1.02225e+06
YML085C	13	99457	C	2	99400	99404.5	99395.5
YMR214W	13	695317	W	2	695354	695350	695358
YMR235C	13	742777	C	2	742716	742720	742712
YMR293C	13	856825	C	2	856774	856778	856770
YMR304W	13	874765	W	2	874841	874836	874846
YMR315W-A	13	904183	W	2	904112	904108	904116
YNL214W	14	245597	W	2	245643	245638	245648
YNL095C	14	447025	C	2	447034	447038	447030
YNR010W	14	643446	W	2	643498	643494	643502
YNR029C	14	678530	C	2	678483	678488	678478
YOL125W	15	83773	W	2	83820	83815.5	83824.5
YOR021C	15	373521	C	2	373450	373454	373446
YOR347C	15	986577	C	2	986505	986510	986500
YBL075C	2	86548	C	2	86611	86616	86606
YBR021W	2	281308	W	2	281348	281343	281353
YBR041W	2	318188	W	2	318266	318261	318271
YBR081C	2	405391	C	2	405332	405337	405327
YBR236C	2	691736	C	2	691682	691687	691677
YCR063W	3	228277	W	2	228334	228329	228339
YCR068W	3	237053	W	2	237098	237093	237103
YDL219W	4	65189	W	2	65261	65256	65266
YDL144C	4	199769	C	2	199715	199720	199710
YDR109C	4	675914	C	2	675837	675842	675832
YDR169C-A	4	794822	C	2	794839	794844	794834
YDR190C	4	842059	C	2	841990	841995	841985
YDR318W	4	1103887	W	2	1103940	1103935	1103945
YDR388W	4	1250119	W	2	1250187	1250182	1250192
YDR517W	4	1477119	W	2	1477191	1477186	1477196
YER172C	5	536089	C	2	536029	536034	536024
YFL047W	6	40413	W	2	40448	40443	40453
YFL034C-A	6	64993	C	2	64940	64945	64935
YFL020C	6	99625	C	2	99556	99561	99551
YFR010W	6	164997	W	2	165014	165009	165019
YFR050C	6	249929	C	2	249867	249872	249862
YGL224C	7	78958	C	2	78923	78928	78918
YGL005C	7	490587	C	2	490533	490538	490528
YIL147C	9	73681	C	2	73610	73615	73605
YIL138C	9	89745	C	2	89697	89702	89692
YIL095W	9	183765	W	2	183828	183823	183833
YJL037W	10	376477	W	2	376425	376420	376430
YJR125C	10	655945	C	2	655889	655894	655884
YKL068W-A	11	308748	W	2	308809	308804	308814
YKL033W	11	375072	W	2	375120	375115	375125
YKR078W	11	584280	W	2	584221	584216	584226
YKR079C	11	589212	C	2	589186	589191	589181
YLL060C	12	21941	C	2	22001	22006	21996
YLR163C	12	493289	C	2	493240	493245	493235
YLR273C	12	691361	C	2	691290	691295	691285
YLR449W	12	1030779	W	2	1030847	1030842	1030852
YML005W	13	260213	W	2	260270	260265	260275
YMR011W	13	288037	W	2	288108	288103	288113
YMR071C	13	411353	C	2	411275	411280	411270
YMR185W	13	628989	W	2	629039	629034	629044
YMR233W	13	739141	W	2	739208	739203	739213
YNL252C	14	172305	C	2	172256	172261	172251
YNL158W	14	339557	W	2	339617	339612	339622
YNR028W	14	676094	W	2	676158	676153	676163
YNR052C	14	720770	C	2	720718	720723	720713
YOL062C	15	212025	C	2	211974	211979	211969
YOR008C-A	15	343184	C	2	343244	343249	343239
YOR124C	15	558745	C	2	558702	558707	558697
YOR286W	15	850245	W	2	850297	850292	850302
YPL243W	16	88421	W	2	88464	88459	88469
YPL225W	16	125957	W	2	126021	126016	126026
YPL217C	16	143225	C	2	143166	143171	143161
YPL007C	16	543883	C	2	543836	543841	543831
YPR089W	16	713239	W	2	713289	713284	713294
YAL034W-A	1	79691	W	2	79732	79726.5	79737.5
YAR018C	1	171711	C	2	171695	171700	171690
YBL020W	2	182323	W	2	182353	182348	182358
YBR058C	2	356064	C	2	356019	356024	356014
YBR092C	2	429143	C	2	429163	429168	429158
YBR095C	2	435743	C	2	435689	435694	435684
YBR165W	2	568756	W	2	568796	568790	568802
YBR171W	2	578316	W	2	578377	578372	578382
YCR051W	3	214037	W	2	214097	214092	214102
YCR066W	3	231445	W	2	231504	231498	231510
YDL194W	4	111479	W	2	111412	111406	111418
YDL159W	4	172437	W	2	172485	172480	172490
YDL148C	4	190633	C	2	190595	190600	190590
YDL065C	4	337313	C	2	337245	337250	337240
YDL054C	4	361377	C	2	361318	361324	361312
YDR013W	4	473141	W	2	473188	473182	473194
YDR101C	4	657505	C	2	657452	657458	657446
YDR117C	4	685674	C	2	685630	685636	685624
YDR281C	4	1022387	C	2	1022410	1.02242e+06	1.0224e+06
YDR323C	4	1114051	C	2	1114021	1.11403e+06	1.11402e+06
YDR351W	4	1178423	W	2	1178467	1.17846e+06	1.17847e+06
YDR361C	4	1196291	C	2	1196244	1.19625e+06	1.19624e+06
YDR422C	4	1317835	C	2	1317817	1.31782e+06	1.31781e+06
YDR513W	4	1470943	W	2	1471017	1.47101e+06	1.47102e+06
YDR528W	4	1494263	W	2	1494294	1.49429e+06	1.4943e+06
YEL046C	5	68897	C	2	68898	68903.5	68892.5
YER114C	5	394025	C	2	393960	393966	393954
YER116C	5	396265	C	2	396215	396220	396210
YER188C-A	5	570004	C	2	570012	570018	570006
YFL024C	6	90657	C	2	90601	90606.5	90595.5
YFR038W	6	229349	W	2	229428	229422	229434
YGL219C	7	84306	C	2	84234	84239.5	84228.5
YGL151W	7	217471	W	2	217532	217526	217538
YGR006W	7	506055	W	2	506098	506092	506104
YGR181W	7	858223	W	2	858283	858278	858288
YGR197C	7	894347	C	2	894307	894312	894302
YGR243W	7	977262	W	2	977232	977226	977238
YGR276C	7	1045706	C	2	1045696	1.0457e+06	1.04569e+06
YHL044W	8	13525	W	2	13587	13581.5	13592.5
YHL038C	8	25553	C	2	25507	25512.5	25501.5
YHR003C	8	111329	C	2	111276	111282	111270
YHR080C	8	267024	C	2	266995	267000	266990
YHR193C	8	488291	C	2	488221	488226	488216
YHR197W	8	493871	W	2	493913	493908	493918
YHR206W	8	512439	W	2	512498	512492	512504
YIL157C	9	47577	C	2	47522	47527.5	47516.5
YIL156W-B	9	47588	W	2	47522	47516.5	47527.5
YIL153W	9	55165	W	2	55233	55227.5	55238.5
YIL078W	9	212437	W	2	212496	212490	212502
YIR039C	9	432257	C	2	432316	432322	432310
YJL109C	10	217257	C	2	217214	217220	217208
YJL061W	10	319877	W	2	319938	319932	319944
YJL033W	10	383701	W	2	383770	383764	383776
YJR005W	10	445781	W	2	445823	445818	445828
YJR031C	10	490809	C	2	490756	490762	490750
YJR107W	10	627153	W	2	627118	627112	627124
YJR118C	10	644073	C	2	644019	644024	644014
YKL179C	11	112524	C	2	112500	112506	112494
YKL168C	11	133476	C	2	133420	133426	133414
YKL058W	11	329760	W	2	329820	329814	329826
YKL057C	11	333668	C	2	333622	333628	333616
YLL015W	12	116309	W	2	116347	116342	116352
YLL013C	12	124969	C	2	124940	124946	124934
YLR026C	12	196593	C	2	196526	196532	196520
YLR065C	12	266977	C	2	266901	266906	266896
YLR116W	12	380845	W	2	380891	380886	380896
YLR126C	12	395623	C	2	395563	395568	395558
YLR283W	12	705125	W	2	705200	705194	705206
YLR290C	12	718001	C	2	717939	717944	717934
YLR326W	12	782011	W	2	782081	782076	782086
YLR371W	12	862515	W	2	862535	862530	862540
YLR455W	12	1053355	W	2	1053424	1.05342e+06	1.05343e+06
YML111W	13	46789	W	2	46857	46851.5	46862.5
YML043C	13	191937	C	2	191872	191878	191866
YML010W	13	247629	W	2	247695	247690	247700
YML001W	13	267072	W	2	267118	267112	267124
YMR218C	13	706937	C	2	706864	706870	706858
YMR221C	13	715473	C	2	715422	715428	715416
YMR238W	13	746213	W	2	746267	746262	746272
YMR285C	13	841705	C	2	841700	841706	841694
YMR287C	13	845401	C	2	845354	845360	845348
YMR313C	13	901337	C	2	901282	901288	901276
YNL321W	14	34669	W	2	34723	34717.5	34728.5
YNL090W	14	456389	W	2	456457	456452	456462
YNL062C	14	510258	C	2	510215	510220	510210
YOL098C	15	135929	C	2	135866	135872	135860
YOR002W	15	329349	W	2	329387	329382	329392
YOR008C	15	342657	C	2	342612	342618	342606
YOR046C	15	415953	C	2	415892	415898	415886
YOR052C	15	427361	C	2	427365	427370	427360
YOR296W	15	870099	W	2	870145	870140	870150
YOR367W	15	1025989	W	2	1026028	1.02602e+06	1.02603e+06
YPL097W	16	364927	W	2	364967	364962	364972
YPL002C	16	554363	C	2	554333	554338	554328
YPR062W	16	677127	W	2	677191	677186	677196
YPR124W	16	786023	W	2	786061	786056	786066
YPR135W	16	799167	W	2	799236	799230	799242
YPR137W	16	802271	W	2	802322	802316	802328
YAR014C	1	169023	C	2	168970	168976	168964
YBL088C	2	59737	C	2	59784	59790	59778
YBL050W	2	125043	W	2	125095	125089	125101
YBR106W	2	452579	W	2	452648	452642	452654
YBR252W	2	722572	W	2	722629	722623	722635
YBR260C	2	734808	C	2	734842	734848	734836
YDL234C	4	36609	C	2	36567	36573	36561
YDL156W	4	174805	W	2	174866	174860	174872
YDL007W	4	437997	W	2	438055	438049	438061
YDR060W	4	570566	W	2	570610	570604	570616
YDR069C	4	587778	C	2	587730	587736	587724
YDR076W	4	598406	W	2	598451	598445	598457
YDR120C	4	693234	C	2	693202	693208	693196
YDR238C	4	940859	C	2	940799	940805	940793
YDR298C	4	1058995	C	2	1058927	1058933	1058921
YDR347W	4	1169063	W	2	1169113	1169107	1169119
YDR405W	4	1277567	W	2	1277637	1277631	1277643
YEL048C	5	65193	C	2	65141	65147	65135
YER100W	5	359277	W	2	359273	359267	359279
YER149C	5	467537	C	2	467475	467481	467469
YFL002C	6	146953	C	2	146879	146885	146873
YGL247W	7	36909	W	2	36959	36953	36965
YGL202W	7	115919	W	2	115967	115961	115973
YGL160W	7	200447	W	2	200472	200466	200478
YGL108C	7	304115	C	2	304067	304073	304061
YGL082W	7	355743	W	2	355790	355784	355796
YGL049C	7	409779	C	2	409721	409727	409715
YGL027C	7	446195	C	2	446120	446126	446114
YGR030C	7	546187	C	2	546128	546134	546122
YGR159C	7	807723	C	2	807730	807736	807724
YGR165W	7	829063	W	2	829138	829132	829144
YGR204W	7	905887	W	2	905921	905915	905927
YGR225W	7	945046	W	2	945093	945087	945099
YGR262C	7	1017810	C	2	1017737	1017743	1017731
YGR287C	7	1069099	C	2	1069162	1069168	1069156
YIL143C	9	83081	C	2	83027	83033	83021
YIL120W	9	134312	W	2	134245	134239	134251
YIR037W	9	423037	W	2	423115	423109	423121
YJL216C	10	26188	C	2	26244	26250	26238
YJL172W	10	97685	W	2	97730	97724	97736
YJL164C	10	111385	C	2	111357	111363	111351
YJL122W	10	189597	W	2	189667	189661	189673
YJL092W	10	257157	W	2	257188	257182	257194
YJL034W	10	381190	W	2	381234	381228	381240
YJL020C	10	402417	C	2	402362	402368	402356
YJR088C	10	587337	C	2	587281	587287	587275
YKL126W	11	205144	W	2	205194	205188	205200
YKL080W	11	284560	W	2	284609	284603	284615
YKR025W	11	487368	W	2	487428	487422	487434
YKR086W	11	599464	W	2	599528	599522	599534
YKR098C	11	634950	C	2	634898	634904	634892
YLL028W	12	84637	W	2	84647	84641	84653
YLR143W	12	427301	W	2	427350	427344	427356
YLR229C	12	605017	C	2	604964	604970	604958
YLR250W	12	640253	W	2	640311	640305	640317
YLR270W	12	681077	W	2	681115	681109	681121
YLR337C	12	805175	C	2	805127	805133	805121
YLR378C	12	877399	C	2	877352	877358	877346
YLR392C	12	906495	C	2	906452	906458	906446
YLR405W	12	929587	W	2	929560	929554	929566
YLR429W	12	990723	W	2	990800	990794	990806
YLR457C	12	1056775	C	2	1056739	1056745	1056733
YML117W	13	34101	W	2	34138	34132	34144
YML116W	13	38069	W	2	38108	38102	38114
YML035C	13	209057	C	2	208995	209001	208989
YMR019W	13	312245	W	2	312266	312260	312272
YMR073C	13	413177	C	2	413118	413124	413112
YMR093W	13	453965	W	2	454032	454026	454038
YMR127C	13	523449	C	2	523405	523411	523399
YMR275C	13	818633	C	2	818582	818588	818576
YNL317W	14	40605	W	2	40658	40652	40664
YNL243W	14	187989	W	2	188057	188051	188063
YNL142W	14	357173	W	2	357203	357197	357209
YNL052W	14	531686	W	2	531738	531732	531744
YNR047W	14	708454	W	2	708523	708517	708529
YOL089C	15	153545	C	2	153509	153515	153503
YOL019W-A	15	288319	W	2	288386	288380	288392
YOR080W	15	474565	W	2	474632	474626	474638
YOR144C	15	605129	C	2	605104	605110	605098
YOR158W	15	632133	W	2	632176	632170	632182
YOR329C	15	939448	C	2	939398	939404	939392
YOR380W	15	1051101	W	2	1051132	1051126	1051138
YPL158C	16	254393	C	2	254318	254324	254312
YPL140C	16	289265	C	2	289203	289209	289197
YPL108W	16	348455	W	2	348518	348512	348524
YPL105C	16	355435	C	2	355395	355401	355389
YPL100W	16	361839	W	2	361865	361859	361871
YPR144C	16	821459	C	2	821411	821417	821405
YPR181C	16	899731	C	2	899670	899676	899664
YPR189W	16	912623	W	2	912680	912674	912686
YPR191W	16	919311	W	2	919327	919321	919333
YAL019W	1	114811	W	2	114852	114846	114858
YBL005W	2	217404	W	2	217388	217382	217394
YBR053C	2	340776	C	2	340738	340744	340732
YBR103W	2	447539	W	2	447584	447578	447590
YBR128C	2	494352	C	2	494334	494340	494328
YDL238C	4	30489	C	2	30452	30458.5	30445.5
YDL193W	4	114565	W	2	114616	114610	114622
YDL177C	4	141801	C	2	141749	141756	141742
YDL176W	4	141941	W	2	142004	141998	142010
YDL115C	4	255177	C	2	255119	255126	255112
YDL093W	4	289869	W	2	289881	289874	289888
YDL075W	4	322181	W	2	322226	322220	322232
YDR055W	4	563446	W	2	563409	563402	563416
YDR084C	4	614066	C	2	614005	614012	613998
YDR170C	4	802418	C	2	802391	802398	802384
YDR251W	4	960279	W	2	960335	960328	960342
YDR267C	4	1003555	C	2	1003506	1.00351e+06	1.0035e+06
YDR273W	4	1009831	W	2	1009850	1.00984e+06	1.00986e+06
YDR333C	4	1135451	C	2	1135420	1.13543e+06	1.13541e+06
YDR358W	4	1189975	W	2	1190047	1.19004e+06	1.19005e+06
YDR387C	4	1249923	C	2	1249903	1.24991e+06	1.2499e+06
YDR394W	4	1261551	W	2	1261609	1.2616e+06	1.26162e+06
YDR496C	4	1443427	C	2	1443378	1.44338e+06	1.44337e+06
YEL013W	5	128573	W	2	128628	128622	128634
YER017C	5	191889	C	2	191835	191842	191828
YER019W	5	192389	W	2	192407	192400	192414
YFR034C	6	226001	C	2	225937	225944	225930
YGL248W	7	35525	W	2	35563	35556.5	35569.5
YGL221C	7	82322	C	2	82270	82276.5	82263.5
YGL161C	7	200259	C	2	200186	200192	200180
YGL122C	7	280563	C	2	280510	280516	280504
YGR002C	7	499915	C	2	499869	499876	499862
YGR007W	7	506943	W	2	507000	506994	507006
YGR072W	7	634239	W	2	634309	634302	634316
YHR088W	8	281452	W	2	281507	281500	281514
YHR133C	8	371641	C	2	371570	371576	371564
YHR144C	8	388737	C	2	388719	388726	388712
YIL101C	9	177433	C	2	177394	177400	177388
YIL006W	9	344045	W	2	344084	344078	344090
YJL194W	10	69293	W	2	69309	69302.5	69315.5
YJL137C	10	156113	C	2	156085	156092	156078
YJL126W	10	184349	W	2	184428	184422	184434
YJL054W	10	333957	W	2	333964	333958	333970
YJR080C	10	581577	C	2	581511	581518	581504
YJR097W	10	612237	W	2	612277	612270	612284
YJR117W	10	641861	W	2	641940	641934	641946
YKL172W	11	125728	W	2	125776	125770	125782
YKL020C	11	401772	C	2	401713	401720	401706
YKL017C	11	406908	C	2	406834	406840	406828
YLR008C	12	166193	C	2	166128	166134	166122
YLR106C	12	363881	C	2	363835	363842	363828
YLR172C	12	502201	C	2	502136	502142	502130
YLR292C	12	720417	C	2	720363	720370	720356
YLR368W	12	857467	W	2	857541	857534	857548
YLR370C	12	862303	C	2	862260	862266	862254
YLR387C	12	897767	C	2	897702	897708	897696
YLR447C	12	1027959	C	2	1027894	1.0279e+06	1.02789e+06
YMR003W	13	273077	W	2	273116	273110	273122
YMR027W	13	325797	W	2	325842	325836	325848
YMR061W	13	392725	W	2	392773	392766	392780
YMR086W	13	439125	W	2	439205	439198	439212
YMR110C	13	492017	C	2	491975	491982	491968
YMR136W	13	541109	W	2	541030	541024	541036
YMR137C	13	544993	C	2	544956	544962	544950
YMR150C	13	562593	C	2	562527	562534	562520
YMR210W	13	687493	W	2	687525	687518	687532
YMR256C	13	779177	C	2	779115	779122	779108
YMR264W	13	795733	W	2	795792	795786	795798
YMR271C	13	807849	C	2	807882	807888	807876
YNL311C	14	51705	C	2	51660	51666.5	51653.5
YNL290W	14	86189	W	2	86252	86245.5	86258.5
YNL286W	14	94949	W	2	94930	94923.5	94936.5
YNL271C	14	135657	C	2	135603	135610	135596
YNL248C	14	182681	C	2	182610	182616	182604
YNL156C	14	342185	C	2	342129	342136	342122
YNL126W	14	387157	W	2	387220	387214	387226
YNL087W	14	462269	W	2	462318	462312	462324
YNL069C	14	495033	C	2	494968	494974	494962
YNL032W	14	574341	W	2	574407	574400	574414
YNR048W	14	711582	W	2	711644	711638	711650
YOL164W-A	15	4028	W	2	4015	4008.5	4021.5
YOL102C	15	126713	C	2	126647	126654	126640
YOR014W	15	357421	W	2	357462	357456	357468
YOR022C	15	375873	C	2	375810	375816	375804
YOR117W	15	544941	W	2	545002	544996	545008
YOR125C	15	559801	C	2	559750	559756	559744
YOR168W	15	649261	W	2	649316	649310	649322
YOR202W	15	721917	W	2	721967	721960	721974
YOR209C	15	737881	C	2	737851	737858	737844
YOR247W	15	797405	W	2	797327	797320	797334
YOR321W	15	915957	W	2	916013	916006	916020
YOR373W	15	1036765	W	2	1036804	1.0368e+06	1.03681e+06
YPL264C	16	44585	C	2	44579	44585.5	44572.5
YPL149W	16	271237	W	2	271293	271286	271300
YPL139C	16	291113	C	2	291059	291066	291052
YPL118W	16	326525	W	2	326585	326578	326592
YPL021W	16	510997	W	2	510934	510928	510940
YPR036W	16	643775	W	2	643848	643842	643854
YPR043W	16	654111	W	2	654184	654178	654190
YPR055W	16	667623	W	2	667659	667652	667666
YPR104C	16	736715	C	2	736666	736672	736660
YAL047C	1	57047	C	2	57029	57036	57022
YAL032C	1	84503	C	2	84456	84463	84449
YAL026C	1	99791	C	2	99732	99739	99725
YAR007C	1	158703	C	2	158640	158647	158633
YBL103C	2	23801	C	2	23745	23752	23738
YBR033W	2	301842	W	2	301835	301828	301842
YBR057C	2	353400	C	2	353344	353351	353337
YBR200W	2	620804	W	2	620848	620841	620855
YBR287W	2	776484	W	2	776549	776542	776556
YCL048W-A	3	41386	W	2	41341	41334	41348
YCR036W	3	193253	W	2	193321	193314	193328
YCR081W	3	254189	W	2	254165	254158	254172
YCR082W	3	258829	W	2	258877	258870	258884
YDL225W	4	52381	W	2	52439	52432	52446
YDL207W	4	88205	W	2	88277	88270	88284
YDL181W	4	134989	W	2	135017	135010	135024
YDL142C	4	202649	C	2	202578	202585	202571
YDL121C	4	245625	C	2	245574	245581	245567
YDR022C	4	488681	C	2	488632	488639	488625
YDR058C	4	568730	C	2	568697	568704	568690
YDR079W	4	603022	W	2	603091	603084	603098
YDR137W	4	728142	W	2	728216	728209	728223
YDR188W	4	836335	W	2	836409	836402	836416
YDR197W	4	851167	W	2	851239	851232	851246
YDR206W	4	861711	W	2	861769	861762	861776
YDR226W	4	916415	W	2	916465	916458	916472
YDR245W	4	952703	W	2	952756	952749	952763
YDR246W	4	954248	W	2	954312	954305	954319
YDR302W	4	1067663	W	2	1067722	1067715	1067729
YDR335W	4	1140791	W	2	1140841	1140834	1140848
YDR497C	4	1445547	C	2	1445526	1445533	1445519
YEL011W	5	132933	W	2	132992	132985	132999
YER036C	5	225249	C	2	225225	225232	225218
YER051W	5	254629	W	2	254694	254687	254701
YER139C	5	451369	C	2	451302	451309	451295
YGL215W	7	87494	W	2	87545	87538	87552
YGL183C	7	157393	C	2	157422	157429	157415
YGL166W	7	191119	W	2	191150	191143	191157
YGL083W	7	352983	W	2	353036	353029	353043
YGL058W	7	393911	W	2	393983	393976	393990
YGR096W	7	676591	W	2	676612	676605	676619
YGR105W	7	698543	W	2	698612	698605	698619
YGR171C	7	842595	C	2	842518	842525	842511
YHR161C	8	422393	C	2	422423	422430	422416
YIL135C	9	96449	C	2	96393	96400	96386
YIL019W	9	315069	W	2	315115	315108	315122
YIL014W	9	325925	W	2	325983	325976	325990
YIR041W	9	433823	W	2	433855	433848	433862
YJL207C	10	47465	C	2	47394	47401	47387
YJL003W	10	432517	W	2	432549	432542	432556
YJR001W	10	436645	W	2	436701	436694	436708
YJR151W-A	10	717394	W	2	717455	717448	717462
YJR156C	10	729614	C	2	729604	729611	729597
YKL183C-A	11	98714	C	2	98782	98789	98775
YKL176C	11	118340	C	2	118292	118299	118285
YKL162C	11	148884	C	2	148893	148900	148886
YKL157W	11	154960	W	2	155008	155001	155015
YKL022C	11	396804	C	2	396742	396749	396735
YKL014C	11	416588	C	2	416543	416550	416536
YKR008W	11	451800	W	2	451871	451864	451878
YKR016W	11	469304	W	2	469368	469361	469375
YKR022C	11	482836	C	2	482791	482798	482784
YKR071C	11	575676	C	2	575618	575625	575611
YLL033W	12	73413	W	2	73434	73427	73441
YLL018C	12	111625	C	2	111575	111582	111568
YLL006W	12	136549	W	2	136592	136585	136599
YLR033W	12	208701	W	2	208761	208754	208768
YLR410W	12	937475	W	2	937527	937520	937534
YML067C	13	140241	C	2	140186	140193	140179
YML057W	13	160093	W	2	160141	160134	160148
YML017W	13	236509	W	2	236563	236556	236570
YMR079W	13	424933	W	2	424997	424990	425004
YMR153W	13	564381	W	2	564440	564433	564447
YMR175W-A	13	611211	W	2	611221	611214	611228
YMR228W	13	724597	W	2	724623	724616	724630
YMR270C	13	806561	C	2	806516	806523	806509
YMR303C	13	874337	C	2	874341	874348	874334
YMR311C	13	897657	C	2	897595	897602	897588
YNL280C	14	110481	C	2	110506	110513	110499
YNL277W-A	14	116577	W	2	116523	116516	116530
YNL256W	14	164557	W	2	164592	164585	164599
YNL237W	14	204837	W	2	204905	204898	204912
YNL085W	14	466861	W	2	466863	466856	466870
YOL145C	15	52841	C	2	52805	52812	52798
YOL071W	15	196405	W	2	196326	196319	196333
YOL054W	15	228533	W	2	228594	228587	228601
YOL005C	15	316217	C	2	316185	316192	316178
YOR039W	15	405605	W	2	405661	405654	405668
YOR128C	15	566249	C	2	566229	566236	566222
YOR143C	15	602433	C	2	602381	602388	602374
YOR197W	15	717053	W	2	717115	717108	717122
YOR229W	15	768333	W	2	768383	768376	768390
YOR387C	15	1070341	C	2	1070333	1070340	1070326
YPL229W	16	117029	W	2	117070	117063	117077
YPL135W	16	297453	W	2	297474	297467	297481
YPR091C	16	718515	C	2	718449	718456	718442
YHR150W	8	397189	W	3	397237	397230	397244
YIR010W	9	375341	W	3	375410	375403	375417
YOR172W	15	654149	W	3	654225	654218	654232
YAL010C	1	135711	C	2	135657	135664	135650
YBL038W	2	146115	W	2	146155	146148	146162
YBL021C	2	182151	C	2	182081	182088	182074
YBR163W	2	565604	W	2	565675	565668	565682
YBR164C	2	568552	C	2	568501	568508	568494
YBR180W	2	589634	W	2	589706	589698	589714
YBR192W	2	607460	W	2	607508	607500	607516
YCL043C	3	50281	C	2	50247	50254.5	50239.5
YCR071C	3	240585	C	2	240532	240540	240524
YDL244W	4	16102	W	2	16095	16087.5	16102.5
YDL226C	4	52201	C	2	52161	52168.5	52153.5
YDL153C	4	183065	C	2	183008	183016	183000
YDL112W	4	258837	W	2	258887	258880	258894
YDL106C	4	271985	C	2	271910	271918	271902
YDL102W	4	276773	W	2	276827	276820	276834
YDL030W	4	397453	W	2	397498	397490	397506
YDR001C	4	452713	C	2	452717	452724	452710
YDR031W	4	503461	W	2	503518	503510	503526
YDR034C	4	512258	C	2	512197	512204	512190
YDR091C	4	628602	C	2	628547	628554	628540
YDR104C	4	664954	C	2	664903	664910	664896
YDR135C	4	727610	C	2	727579	727586	727572
YDR237W	4	936447	W	2	936523	936516	936530
YDR244W	4	950535	W	2	950556	950548	950564
YDR322W	4	1110559	W	2	1110613	1.11061e+06	1.11062e+06
YDR352W	4	1181591	W	2	1181645	1.18164e+06	1.18165e+06
YDR440W	4	1342391	W	2	1342446	1.34244e+06	1.34245e+06
YDR477W	4	1412063	W	2	1412120	1.41211e+06	1.41213e+06
YDR478W	4	1414527	W	2	1414589	1.41458e+06	1.4146e+06
YEL061C	5	39665	C	2	39613	39620.5	39605.5
YEL056W	5	47101	W	2	47141	47133.5	47148.5
YEL032W	5	86885	W	2	86907	86899.5	86914.5
YER094C	5	349449	C	2	349402	349410	349394
YER096W	5	351592	W	2	351580	351572	351588
YER123W	5	404621	W	2	404670	404662	404678
YFL037W	6	56261	W	2	56333	56325.5	56340.5
YGL091C	7	343115	C	2	343056	343064	343048
YGL086W	7	347167	W	2	347214	347206	347222
YGL084C	7	352355	C	2	352299	352306	352292
YGR038W	7	560519	W	2	560590	560582	560598
YGR057C	7	605595	C	2	605521	605528	605514
YGR090W	7	662071	W	2	662125	662118	662132
YGR118W	7	726943	W	2	726987	726980	726994
YGR150C	7	793091	C	2	793046	793054	793038
YGR170W	7	837087	W	2	837134	837126	837142
YGR267C	7	1025906	C	2	1025883	1.02589e+06	1.02588e+06
YGR272C	7	1038578	C	2	1038504	1.03851e+06	1.0385e+06
YHL023C	8	62625	C	2	62552	62559.5	62544.5
YHR064C	8	227192	C	2	227131	227138	227124
YHR079C	8	261856	C	2	261791	261798	261784
YHR127W	8	360868	W	2	360926	360918	360934
YIL037C	9	285100	C	2	285053	285060	285046
YJL198W	10	60797	W	2	60836	60828.5	60843.5
YJL166W	10	106317	W	2	106386	106378	106394
YJL140W	10	150757	W	2	150829	150822	150836
YJL125C	10	186657	C	2	186595	186602	186588
YJL124C	10	187737	C	2	187688	187696	187680
YJL091C	10	262489	C	2	262421	262428	262414
YJL030W	10	387533	W	2	387571	387564	387578
YJL001W	10	435021	W	2	435086	435078	435094
YKL215C	11	30761	C	2	30713	30720.5	30705.5
YKL206C	11	49857	C	2	49785	49792.5	49777.5
YKL193C	11	79932	C	2	79860	79867.5	79852.5
YKL187C	11	91140	C	2	91135	91142.5	91127.5
YKL122C	11	212692	C	2	212632	212640	212624
YKL067W	11	314328	W	2	314396	314388	314404
YKR030W	11	499848	W	2	499913	499906	499920
YKR048C	11	526316	C	2	526255	526262	526248
YLL043W	12	49853	W	2	49908	49900.5	49915.5
YLR138W	12	418269	W	2	418320	418312	418328
YLR173W	12	502341	W	2	502401	502394	502408
YLR421C	12	965623	C	2	965550	965558	965542
YLR454W	12	1043867	W	2	1043917	1.04391e+06	1.04392e+06
YML079W	13	110229	W	2	110257	110250	110264
YML034W	13	209437	W	2	209470	209462	209478
YML032C	13	213977	C	2	213921	213928	213914
YML006C	13	258518	C	2	258526	258534	258518
YMR068W	13	406262	W	2	406341	406334	406348
YMR111C	13	494209	C	2	494234	494242	494226
YMR142C	13	551249	C	2	551176	551184	551168
YMR161W	13	577661	W	2	577701	577694	577708
YMR178W	13	618429	W	2	618497	618490	618504
YMR301C	13	869657	C	2	869634	869642	869626
YNL287W	14	91789	W	2	91831	91823.5	91838.5
YNL265C	14	145145	C	2	145086	145094	145078
YNL239W	14	200413	W	2	200478	200470	200486
YNL194C	14	273718	C	2	273750	273758	273742
YNL152W	14	346293	W	2	346321	346314	346328
YNL123W	14	394645	W	2	394696	394688	394704
YNL099C	14	439329	C	2	439279	439286	439272
YNL091W	14	452261	W	2	452311	452304	452318
YNL061W	14	510486	W	2	510537	510530	510544
YNR020C	14	668138	C	2	668084	668092	668076
YNR035C	14	694082	C	2	694032	694040	694024
YOR166C	15	648505	C	2	648496	648504	648488
YOR272W	15	832741	W	2	832794	832786	832802
YOR288C	15	853145	C	2	853078	853086	853070
YPL008W	16	539135	W	2	539188	539180	539196
YPR011C	16	584139	C	2	584068	584076	584060
YPR071W	16	688143	W	2	688167	688160	688174
YPR072W	16	689991	W	2	690041	690034	690048
YPR079W	16	698775	W	2	698828	698820	698836
YPR145C-A	16	825024	C	2	824997	825004	824990
YHR059W	8	220044	W	3	220097	220090	220104
YMR089C	13	448289	C	3	448260	448268	448252
YAL064C-A	1	13846	C	2	13789	13797	13781
YAL020C	1	114623	C	2	114579	114587	114571
YAL011W	1	132195	W	2	132238	132230	132246
YAR002C-A	1	154766	C	2	154717	154725	154709
YBL102W	2	23981	W	2	24034	24026	24042
YBL008W	2	209556	W	2	209624	209616	209632
YBR040W	2	316924	W	2	316845	316837	316853
YBR094W	2	431971	W	2	432012	432004	432020
YBR102C	2	447399	C	2	447333	447341	447325
YBR111C	2	461872	C	2	461894	461902	461886
YBR135W	2	504748	W	2	504809	504801	504817
YBR138C	2	515392	C	2	515362	515370	515354
YBR185C	2	600000	C	2	599948	599956	599940
YBR248C	2	716552	C	2	716498	716506	716490
YCL037C	3	58753	C	2	58704	58712	58696
YCR003W	3	118589	W	2	118639	118631	118647
YCR035C	3	193041	C	2	192995	193003	192987
YDL209C	4	87257	C	2	87210	87218	87202
YDL155W	4	176621	W	2	176681	176673	176689
YDL076C	4	321697	C	2	321639	321647	321631
YDL013W	4	428941	W	2	428952	428944	428960
YDL005C	4	442361	C	2	442308	442316	442300
YDR006C	4	461345	C	2	461334	461342	461326
YDR040C	4	538566	C	2	538509	538517	538501
YDR041W	4	539758	W	2	539822	539814	539830
YDR043C	4	543570	C	2	543547	543555	543539
YDR143C	4	743954	C	2	743968	743976	743960
YDR229W	4	924695	W	2	924719	924711	924727
YDR243C	4	950315	C	2	950272	950280	950264
YDR306C	4	1075219	C	2	1075160	1075168	1075152
YDR315C	4	1093595	C	2	1093553	1093561	1093545
YDR369C	4	1217843	C	2	1217786	1217794	1217778
YDR459C	4	1383547	C	2	1383479	1383487	1383471
YDR466W	4	1394999	W	2	1395051	1395043	1395059
YDR476C	4	1411179	C	2	1411102	1411110	1411094
YDR483W	4	1421111	W	2	1421149	1421141	1421157
YER030W	5	213405	W	2	213472	213464	213480
YER072W	5	302701	W	2	302781	302773	302789
YER083C	5	327049	C	2	327000	327008	326992
YGL180W	7	159848	W	2	159918	159910	159926
YGL155W	7	213959	W	2	214011	214003	214019
YGL141W	7	238327	W	2	238362	238354	238370
YGL078C	7	361939	C	2	361877	361885	361869
YGR003W	7	500127	W	2	500157	500149	500165
YGR027C	7	534803	C	2	534780	534788	534772
YGR053C	7	595943	C	2	595889	595897	595881
YGR184C	7	866155	C	2	866104	866112	866096
YGR186W	7	867751	W	2	867793	867785	867801
YGR283C	7	1060090	C	2	1060033	1060041	1060025
YHL030W	8	40053	W	2	40076	40068	40084
YHR028C	8	167489	C	2	167432	167440	167424
YHR077C	8	255640	C	2	255610	255618	255602
YHR153C	8	402705	C	2	402658	402666	402650
YHR183W	8	470871	W	2	470868	470860	470876
YIL142W	9	83253	W	2	83326	83318	83334
YIL124W	9	126173	W	2	126188	126180	126196
YIL112W	9	151549	W	2	151610	151602	151618
YIL031W	9	292453	W	2	292515	292507	292523
YIR030C	9	412817	C	2	412761	412769	412753
YJL155C	10	130721	C	2	130674	130682	130666
YJL143W	10	146965	W	2	147032	147024	147040
YJL129C	10	177521	C	2	177466	177474	177458
YJL127C-B	10	181731	C	2	181668	181676	181660
YJL100W	10	236741	W	2	236774	236766	236782
YJL096W	10	246357	W	2	246393	246385	246401
YJL060W	10	323269	W	2	323304	323296	323312
YJL019W	10	402709	W	2	402741	402733	402749
YKL173W	11	122480	W	2	122542	122534	122550
YKL165C	11	140732	C	2	140685	140693	140677
YKL125W	11	207760	W	2	207794	207786	207802
YKL103C	11	247420	C	2	247360	247368	247352
YKL100C	11	255140	C	2	255090	255098	255082
YKL087C	11	277612	C	2	277568	277576	277560
YKL064W	11	317200	W	2	317235	317227	317243
YKL053C-A	11	339188	C	2	339107	339115	339099
YKL041W	11	359688	W	2	359707	359699	359715
YKR001C	11	442436	C	2	442377	442385	442369
YKR010C	11	461012	C	2	460946	460954	460938
YLR061W	12	263134	W	2	263195	263187	263203
YLR078C	12	286473	C	2	286398	286406	286390
YLR147C	12	434497	C	2	434435	434443	434427
YLR215C	12	571913	C	2	571852	571860	571844
YLR222C	12	581793	C	2	581750	581758	581742
YLR251W	12	641310	W	2	641370	641362	641378
YLR330W	12	787611	W	2	787673	787665	787681
YLR375W	12	871643	W	2	871690	871682	871698
YML037C	13	205457	C	2	205405	205413	205397
YML007W	13	253685	W	2	253702	253694	253710
YMR171C	13	605721	C	2	605690	605698	605682
YMR177W	13	616429	W	2	616480	616472	616488
YMR190C	13	645425	C	2	645379	645387	645371
YMR209C	13	687337	C	2	687256	687264	687248
YMR222C	13	716369	C	2	716293	716301	716285
YMR255W	13	777933	W	2	778001	777993	778009
YNL267W	14	140750	W	2	140815	140807	140823
YNL177C	14	304665	C	2	304597	304605	304589
YNL167C	14	321713	C	2	321680	321688	321672
YNL081C	14	476665	C	2	476609	476617	476601
YOL138C	15	65417	C	2	65348	65356	65340
YOL124C	15	86785	C	2	86751	86759	86743
YOL107W	15	112037	W	2	112109	112101	112117
YOL061W	15	212181	W	2	212235	212227	212243
YOL028C	15	271625	C	2	271551	271559	271543
YOR018W	15	364293	W	2	364366	364358	364374
YOR069W	15	453685	W	2	453738	453730	453746
YOR103C	15	516905	C	2	516852	516860	516844
YOR123C	15	554657	C	2	554591	554599	554583
YOR181W	15	675445	W	2	675457	675449	675465
YOR219C	15	755073	C	2	755056	755064	755048
YOR259C	15	813753	C	2	813698	813706	813690
YOR362C	15	1018801	C	2	1018753	1018761	1018745
YPL224C	16	128289	C	2	128260	128268	128252
YPL211W	16	153437	W	2	153490	153482	153498
YPL178W	16	212101	W	2	212149	212141	212157
YPL164C	16	241545	C	2	241496	241504	241488
YPL134C	16	299545	C	2	299560	299568	299552
YPR019W	16	596655	W	2	596696	596688	596704
YPR037C	16	647115	C	2	647044	647052	647036
YPR056W	16	671079	W	2	671137	671129	671145
YPR127W	16	789903	W	2	789930	789922	789938
YJR150C	10	709725	C	3	709733	709741	709725
YAL031C	1	87079	C	2	87033	87041.5	87024.5
YAL013W	1	129211	W	2	129290	129282	129298
YAR028W	1	184827	W	2	184879	184870	184888
YBL033C	2	159727	C	2	159677	159686	159668
YBL002W	2	236372	W	2	236361	236352	236370
YBR035C	2	306984	C	2	306935	306944	306926
YBR120C	2	481016	C	2	480944	480952	480936
YBR195C	2	611920	C	2	611865	611874	611856
YBR214W	2	651300	W	2	651350	651342	651358
YCR031C	3	178257	C	2	178197	178206	178188
YDL188C	4	125185	C	2	125114	125122	125106
YDR126W	4	703206	W	2	703262	703254	703270
YDR141C	4	740042	C	2	739985	739994	739976
YDR235W	4	933471	W	2	933525	933516	933534
YDR268W	4	1003927	W	2	1003980	1.00397e+06	1.00399e+06
YDR454C	4	1366859	C	2	1366800	1.36681e+06	1.36679e+06
YEL039C	5	80177	C	2	80127	80135.5	80118.5
YER110C	5	382233	C	2	382188	382196	382180
YFL046W	6	42781	W	2	42834	42825.5	42842.5
YFL025C	6	87313	C	2	87282	87290.5	87273.5
YFL018C	6	103185	C	2	103185	103194	103176
YFR002W	6	149981	W	2	150038	150030	150046
YFR051C	6	251833	C	2	251762	251770	251754
YGL234W	7	56382	W	2	56424	56415.5	56432.5
YGL173C	7	180443	C	2	180427	180436	180418
YGL169W	7	185999	W	2	186014	186006	186022
YGL107C	7	306315	C	2	306280	306288	306272
YGL094C	7	334667	C	2	334609	334618	334600
YGL093W	7	334847	W	2	334886	334878	334894
YGL066W	7	377423	W	2	377459	377450	377468
YGR169C-A	7	836772	C	2	836691	836700	836682
YGR185C	7	867563	C	2	867507	867516	867498
YGR260W	7	1012270	W	2	1012246	1.01224e+06	1.01225e+06
YGR277C	7	1046594	C	2	1046540	1.04655e+06	1.04653e+06
YGR285C	7	1063194	C	2	1063131	1.06314e+06	1.06312e+06
YHL029C	8	48009	C	2	47949	47957.5	47940.5
YHR040W	8	187885	W	2	187950	187942	187958
YHR045W	8	195405	W	2	195469	195460	195478
YHR107C	8	328104	C	2	328040	328048	328032
YHR146W	8	390261	W	2	390306	390298	390314
YHR192W	8	486783	W	2	486842	486834	486850
YIL145C	9	77361	C	2	77292	77300.5	77283.5
YIL127C	9	117681	C	2	117633	117642	117624
YIL123W	9	128077	W	2	128046	128038	128054
YIL107C	9	165929	C	2	165913	165922	165904
YIL045W	9	271058	W	2	271093	271084	271102
YJL208C	10	41233	C	2	41200	41208.5	41191.5
YJL029C	10	390833	C	2	390783	390792	390774
YJL008C	10	421625	C	2	421569	421578	421560
YJR036C	10	503600	C	2	503662	503670	503654
YJR041C	10	513745	C	2	513708	513716	513700
YKL144C	11	176548	C	2	176510	176518	176502
YKL113C	11	225564	C	2	225506	225514	225498
YKL035W	11	369416	W	2	369457	369448	369466
YKL012W	11	417888	W	2	417923	417914	417932
YKL005C	11	434652	C	2	434598	434606	434590
YKR003W	11	444928	W	2	445002	444994	445010
YKR007W	11	451048	W	2	451103	451094	451112
YKR088C	11	605093	C	2	605031	605040	605022
YLL040C	12	63665	C	2	63716	63724.5	63707.5
YLL010C	12	130849	C	2	130782	130790	130774
YLR040C	12	229737	C	2	229685	229694	229676
YLR091W	12	322261	W	2	322312	322304	322320
YLR093C	12	327497	C	2	327438	327446	327430
YLR158C	12	483740	C	2	483695	483704	483686
YLR346C	12	822647	C	2	822576	822584	822568
YLR350W	12	828611	W	2	828625	828616	828634
YLR407W	12	932723	W	2	932787	932778	932796
YML086C	13	97537	C	2	97467	97475.5	97458.5
YML071C	13	131673	C	2	131592	131600	131584
YMR099C	13	464857	C	2	464807	464816	464798
YMR202W	13	667461	W	2	667528	667520	667536
YMR215W	13	696733	W	2	696781	696772	696790
YMR224C	13	720681	C	2	720640	720648	720632
YMR231W	13	733501	W	2	733547	733538	733556
YMR247C	13	768105	C	2	768053	768062	768044
[truncated: 2,642 more rows]
